# Supplementary material for: An Immunological Polysaccharide from Tremella fuciformis: Essential Role of Acetylation in Immunomodulation
Source: MDPI journal article supplement (doi:10.3390/ijms231810392), 2022-09-08
Supplement: s1 [file s1]

## Supplementary Materials

# An Immunological Polysaccharide from *Tremella fuciformis*: Essential Role of Acetylation in Immunomodulation

Tzu-Yin Huang <sup>1</sup>, Feng-Ling Yang <sup>1</sup>, Hsiao-Wen Chiu <sup>2</sup>, Hong-Chu Chao <sup>1</sup>, Yen-Ju Yang <sup>1</sup>, Jyh-Horng Sheu <sup>3</sup>,  
Kuo-Feng Hua <sup>2</sup> and Shih-Hsiung Wu <sup>1,\*</sup>

<sup>1</sup> Institute of Biological Chemistry, Academia Sinica, Taipei 115, Taiwan

<sup>2</sup> Department of Biotechnology and Animal Science, National Ilan University, Ilan 260, Taiwan

<sup>3</sup> Department of Marine Biotechnology and Resources, National Sun Yat-sen University,  
Kaohsiung 804, Taiwan

\* Correspondence: shwu@gate.sinica.edu.tw; Tel.: +886-(02)-2785-5696; Fax: +886-(02)-2653-9142

## Table of Contents

|                                                                                                                                                                       |    |
|-----------------------------------------------------------------------------------------------------------------------------------------------------------------------|----|
| <b>Figure S1.</b> The monosaccharide composition analysis of (a) L-fucose, (b) D-xylose, (c) D-mannose, (d) D-glucose, (e) TFP-F1, (f) TFP-F1R, and (g) TFP-F1P. .... | 3  |
| <b>Table S1.</b> GC-MS linkage analysis of the PMAA from TFP-F1 sample .....                                                                                          | 4  |
| <b>Table S2.</b> GC-MS linkage analysis of the PMAA from TFP-F1R sample.....                                                                                          | 4  |
| <b>Table S3.</b> GC-MS linkage analysis of the PMAA from TFP-F1P sample .....                                                                                         | 4  |
| <b>Figure S2.</b> FT-IR spectrum of TFP-F1.....                                                                                                                       | 5  |
| <b>Figure S3.</b> <sup>1</sup> H NMR spectrum of (a) TFP-F1 and (b) deOAc TFP-F1R.....                                                                                | 6  |
| <b>Figure S4.</b> Full <sup>1</sup> H NMR spectrum (800 MHz) of TFP-F1 (D <sub>2</sub> O, 323K).....                                                                  | 7  |
| <b>Figure S5a.</b> Full <sup>13</sup> C NMR spectrum (160 MHz) of TFP-F1 (D <sub>2</sub> O, 323K) .....                                                               | 8  |
| <b>Figure S5b.</b> Enlarged <sup>13</sup> C NMR spectrum (from 55 to 105 ppm) (160 MHz) of TFP-F1.....                                                                | 9  |
| <b>Figure S6a.</b> Full HSQC spectrum of TFP-F1 .....                                                                                                                 | 10 |
| <b>Figure S6b.</b> Enlarged HSQC spectrum (I) of TFP-F1 .....                                                                                                         | 11 |
| <b>Figure S6c.</b> Enlarged HSQC spectrum (II) of TFP-F1 .....                                                                                                        | 12 |
| <b>Figure S7a.</b> Full HMBC spectrum of TFP-F1 .....                                                                                                                 | 13 |
| <b>Figure S7b.</b> Enlarged HMBC spectrum (I) of TFP-F1.....                                                                                                          | 14 |
| <b>Figure S7c.</b> Enlarged HMBC spectrum (II) of TFP-F1 .....                                                                                                        | 15 |
| <b>Figure S7d.</b> Enlarged HMBC spectrum (III) of TFP-F1 .....                                                                                                       | 16 |
| <b>Figure S7e.</b> Enlarged HMBC spectrum (IV) of TFP-F1 .....                                                                                                        | 17 |
| <b>Figure S8.</b> Full COSY spectrum of TFP-F1 .....                                                                                                                  | 18 |
| <b>Figure S9a.</b> Full TOCSY spectrum of TFP-F1.....                                                                                                                 | 19 |
| <b>Figure S9b.</b> Enlarged TOCSY spectrum of TFP-F1 .....                                                                                                            | 20 |
| <b>Figure S10a.</b> Full NOESY spectrum of TFP-F1 .....                                                                                                               | 21 |
| <b>Figure S10b.</b> Enlarged NOESY (I) spectrum of TFP-F1.....                                                                                                        | 22 |
| <b>Figure S10c.</b> Enlarged NOESY (II) spectrum of TFP-F1 .....                                                                                                      | 23 |
| <b>Figure S11.</b> COSY and selective HMBC correlations of TFP-F1.....                                                                                                | 24 |
| <b>Table S4.</b> Key NOE correlations of TFP-F1 .....                                                                                                                 | 24 |
| <b>Figure S12.</b> Full <sup>1</sup> H NMR spectrum (800 MHz) of TFP-F1R (D <sub>2</sub> O, 298K) .....                                                               | 25 |
| <b>Figure S13.</b> Full <sup>13</sup> C NMR spectrum (160 MHz) of TFP-F1R (D <sub>2</sub> O, 298K).....                                                               | 26 |
| <b>Figure S14.</b> Full <sup>1</sup> H NMR spectrum (800 MHz) of deOAc TFP-F1R (D <sub>2</sub> O, 298K).....                                                          | 27 |
| <b>Figure S15.</b> Full <sup>13</sup> C NMR spectrum (160 MHz) of deOAc TFP-F1R (D <sub>2</sub> O, 298K) .....                                                        | 28 |
| <b>Figure S16.</b> The standard curve of LAL assay .....                                                                                                              | 29 |
| <b>Table S5.</b> Key NOE correlations of TFP-F1 .....                                                                                                                 | 29 |
| <b>Figure S17.</b> The endotoxin quantity of TFP-F1 and its derivatives .....                                                                                         | 30 |

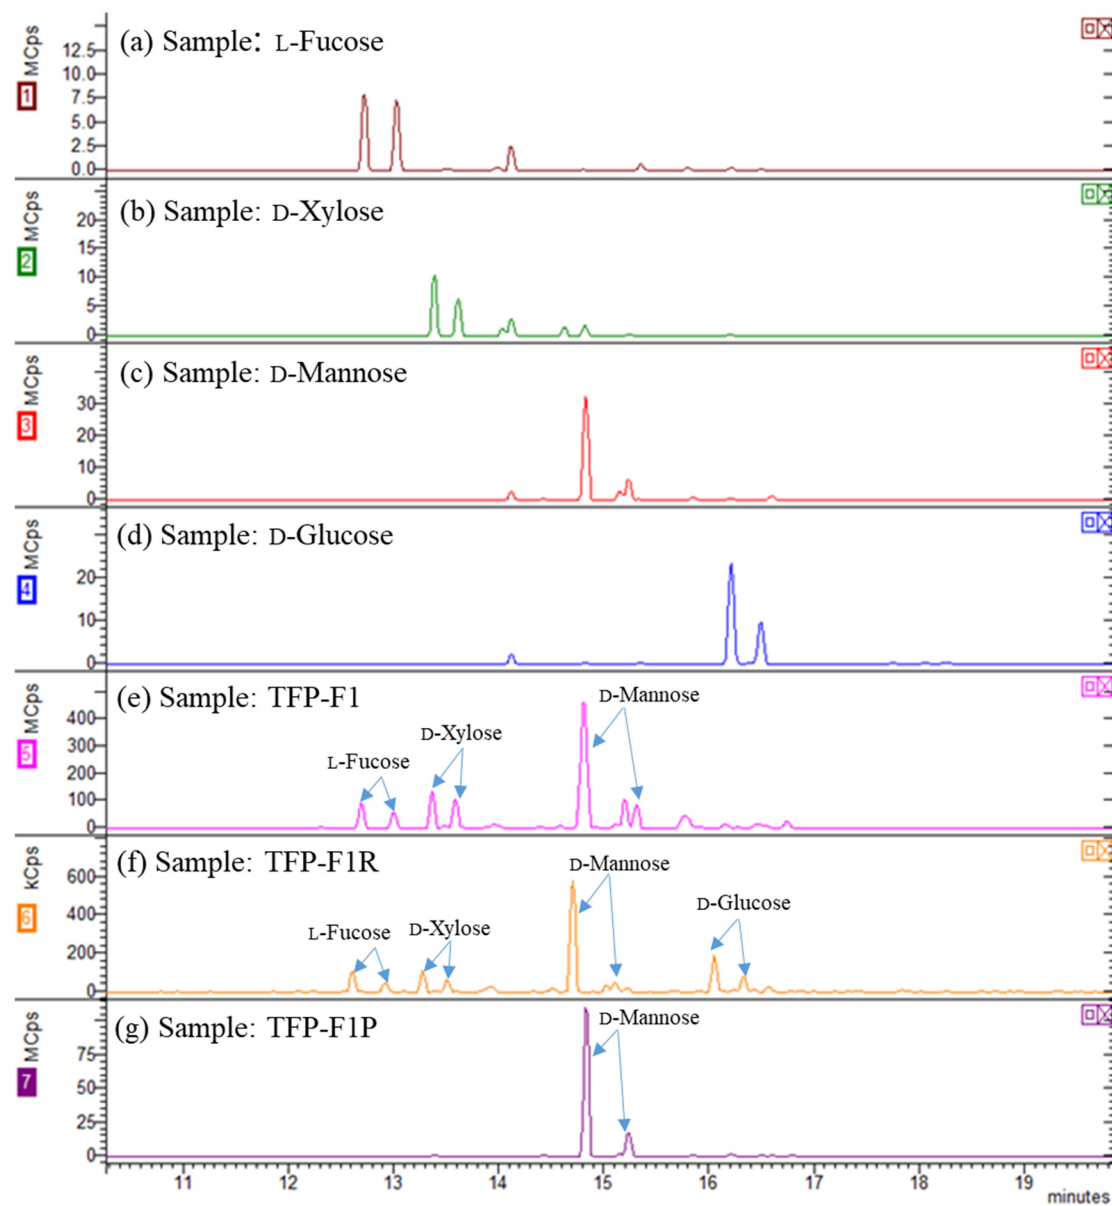

**Figure S1.** The monosaccharide composition analysis of (a) L-fucose, (b) D-xylose, (c) D-mannose, (d) D-glucose, (e) TFP-F1, (f) TFP-F1R, and (g) TFP-F1P.

**Table S1.** GC-MS linkage analysis of the PMAA from the TFP-F1 sample

| Retention time | Alditol derivative                               | <i>m/z</i>                           | Linkage type          |
|----------------|--------------------------------------------------|--------------------------------------|-----------------------|
| 6.77           | 6-deoxy-2,3,4-tri- <i>O</i> -methyl-L-galactitol | 89, 102, 115, 118, 131, 175          | Terminal fucose       |
| 6.90           | 3,4-di- <i>O</i> -methyl-D-xylitol               | 88, 101, 117, 130, 190               | 1,2-linked xylose     |
| 7.19           | 2,4,6-tri- <i>O</i> -methyl-D-mannitol           | 71, 87, 101, 118, 129, 161, 202, 234 | 1,3-linked-mannose    |
| 7.33           | 4,6-di- <i>O</i> -methyl-D-mannitol              | 71, 87, 101, 129, 161, 202, 262      | 1,2,3-linked- mannose |

**Table S2.** GC-MS linkage analysis of the PMAA from TFP-F1R sample

| Retention time | Alditol derivative                               | <i>m/z</i>                                | Linkage type          |
|----------------|--------------------------------------------------|-------------------------------------------|-----------------------|
| 6.77           | 6-deoxy-2,3,4-tri- <i>O</i> -methyl-L-galactitol | 89, 102, 115, 118, 131, 175               | Terminal fucose       |
| 6.90           | 3,4-di- <i>O</i> -methyl-D-xylitol               | 88, 101, 117, 130, 190                    | 1,2-linked xylose     |
| 7.00           | 2,3,4,6-tetra- <i>O</i> -methyl-D-glucitol       | 71, 87, 102, 118, 129, 145, 161, 162, 205 | Terminal glucose      |
| 7.19           | 2,4,6-tri- <i>O</i> -methyl-D-mannitol           | 71, 87, 101, 118, 129, 161, 202, 234      | 1,3-linked-mannose    |
| 7.33           | 4,6-di- <i>O</i> -methyl-D-mannitol              | 71, 87, 101, 129, 161, 202, 262           | 1,2,3-linked- mannose |

**Table S3.** GC-MS linkage analysis of the PMAA from TFP-F1P sample

| Retention time | Alditol derivative                     | <i>m/z</i>                           | Linkage type       |
|----------------|----------------------------------------|--------------------------------------|--------------------|
| 7.19           | 2,4,6-tri- <i>O</i> -methyl-D-mannitol | 71, 87, 101, 118, 129, 161, 202, 234 | 1,3-linked-mannose |

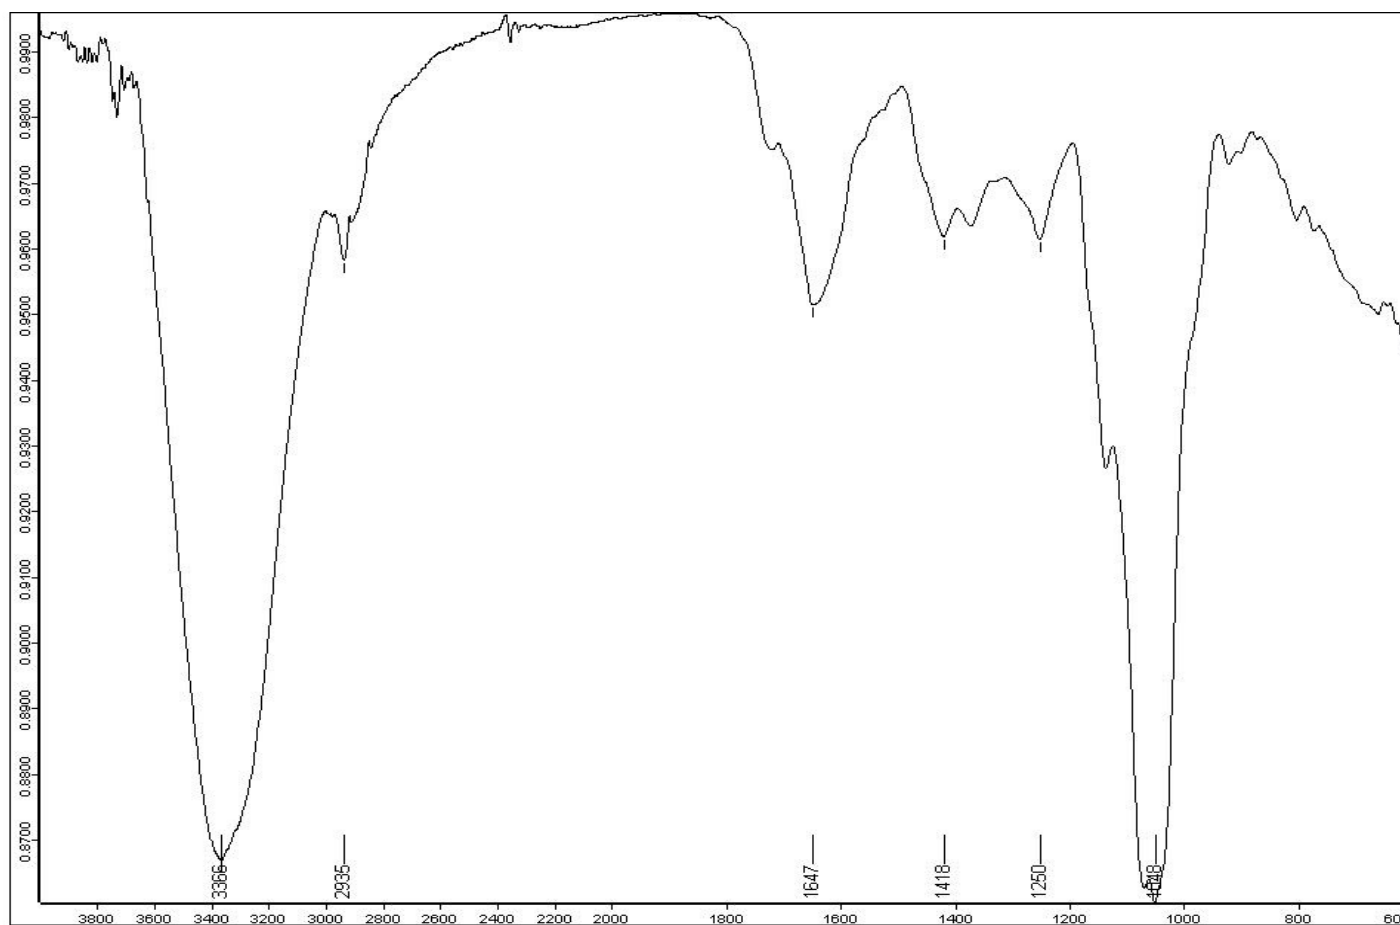

**Figure S2.** FT-IR spectrum of TFP-F1.

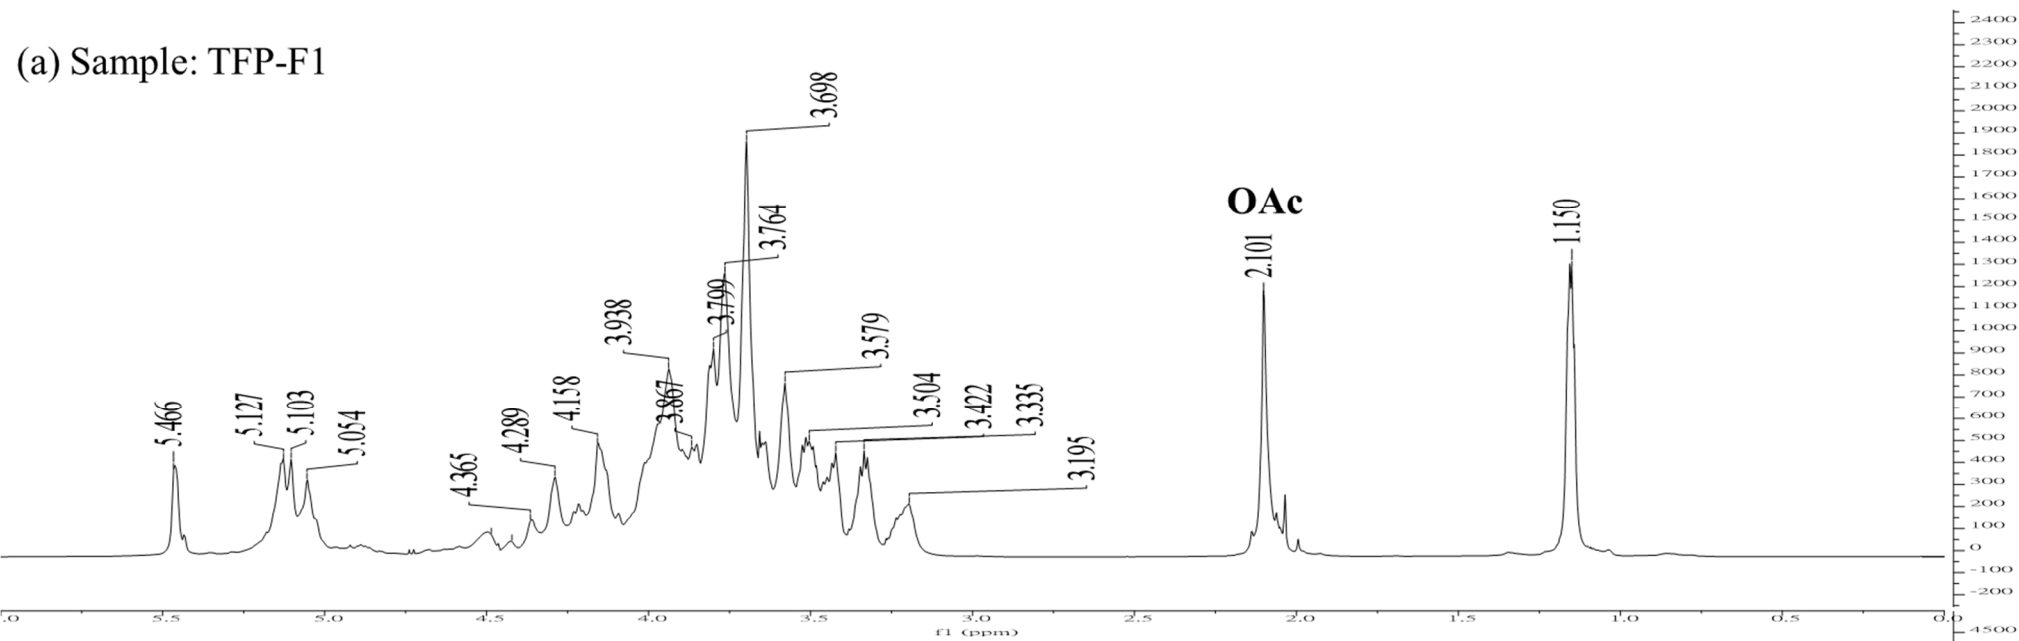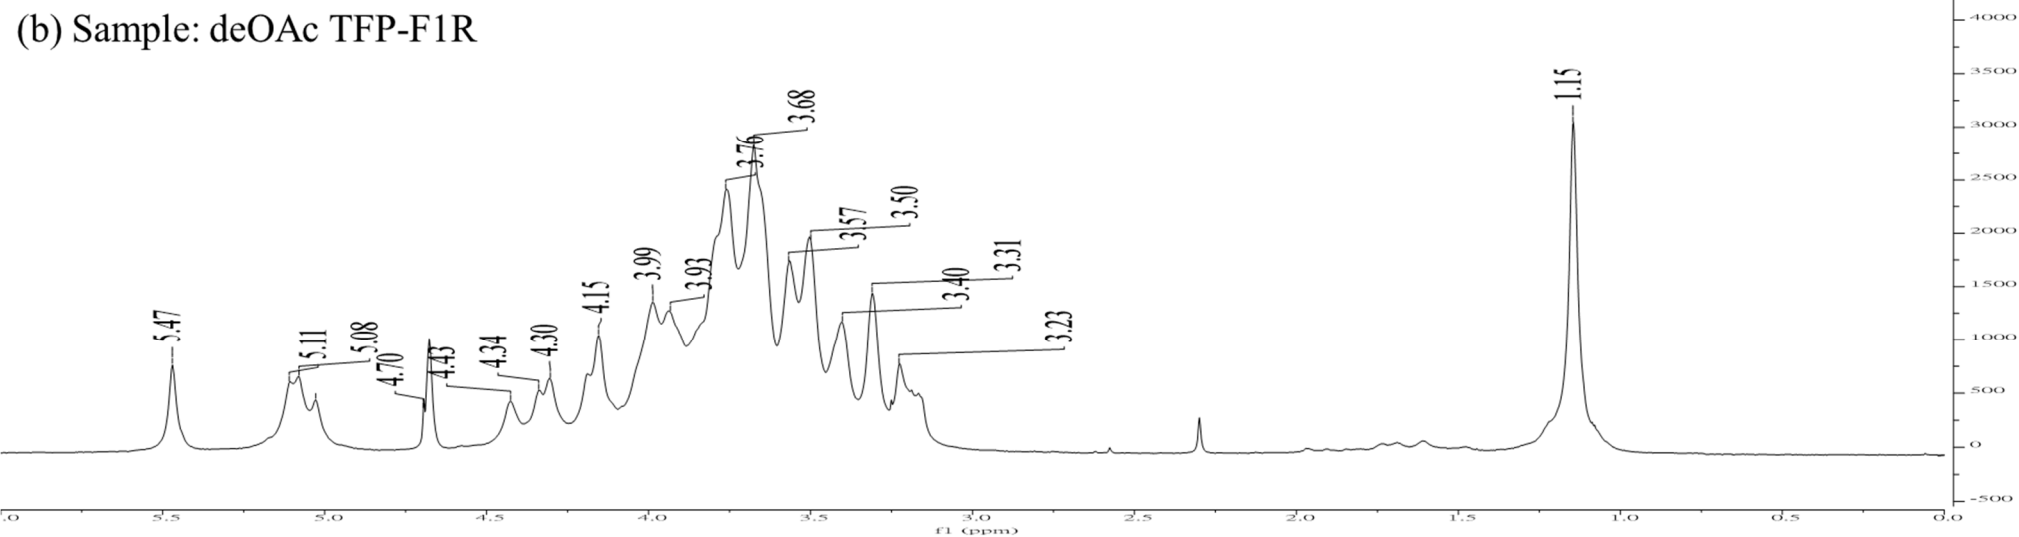

**Figure S3.**  $^1\text{H}$  NMR spectrum of (a) TFP-F1 and (b) deOAc TFP-F1R. The sample of deOAc TFP-F1R was prepared by the carboxyl reduction and de-acetylation of TFP-F1.

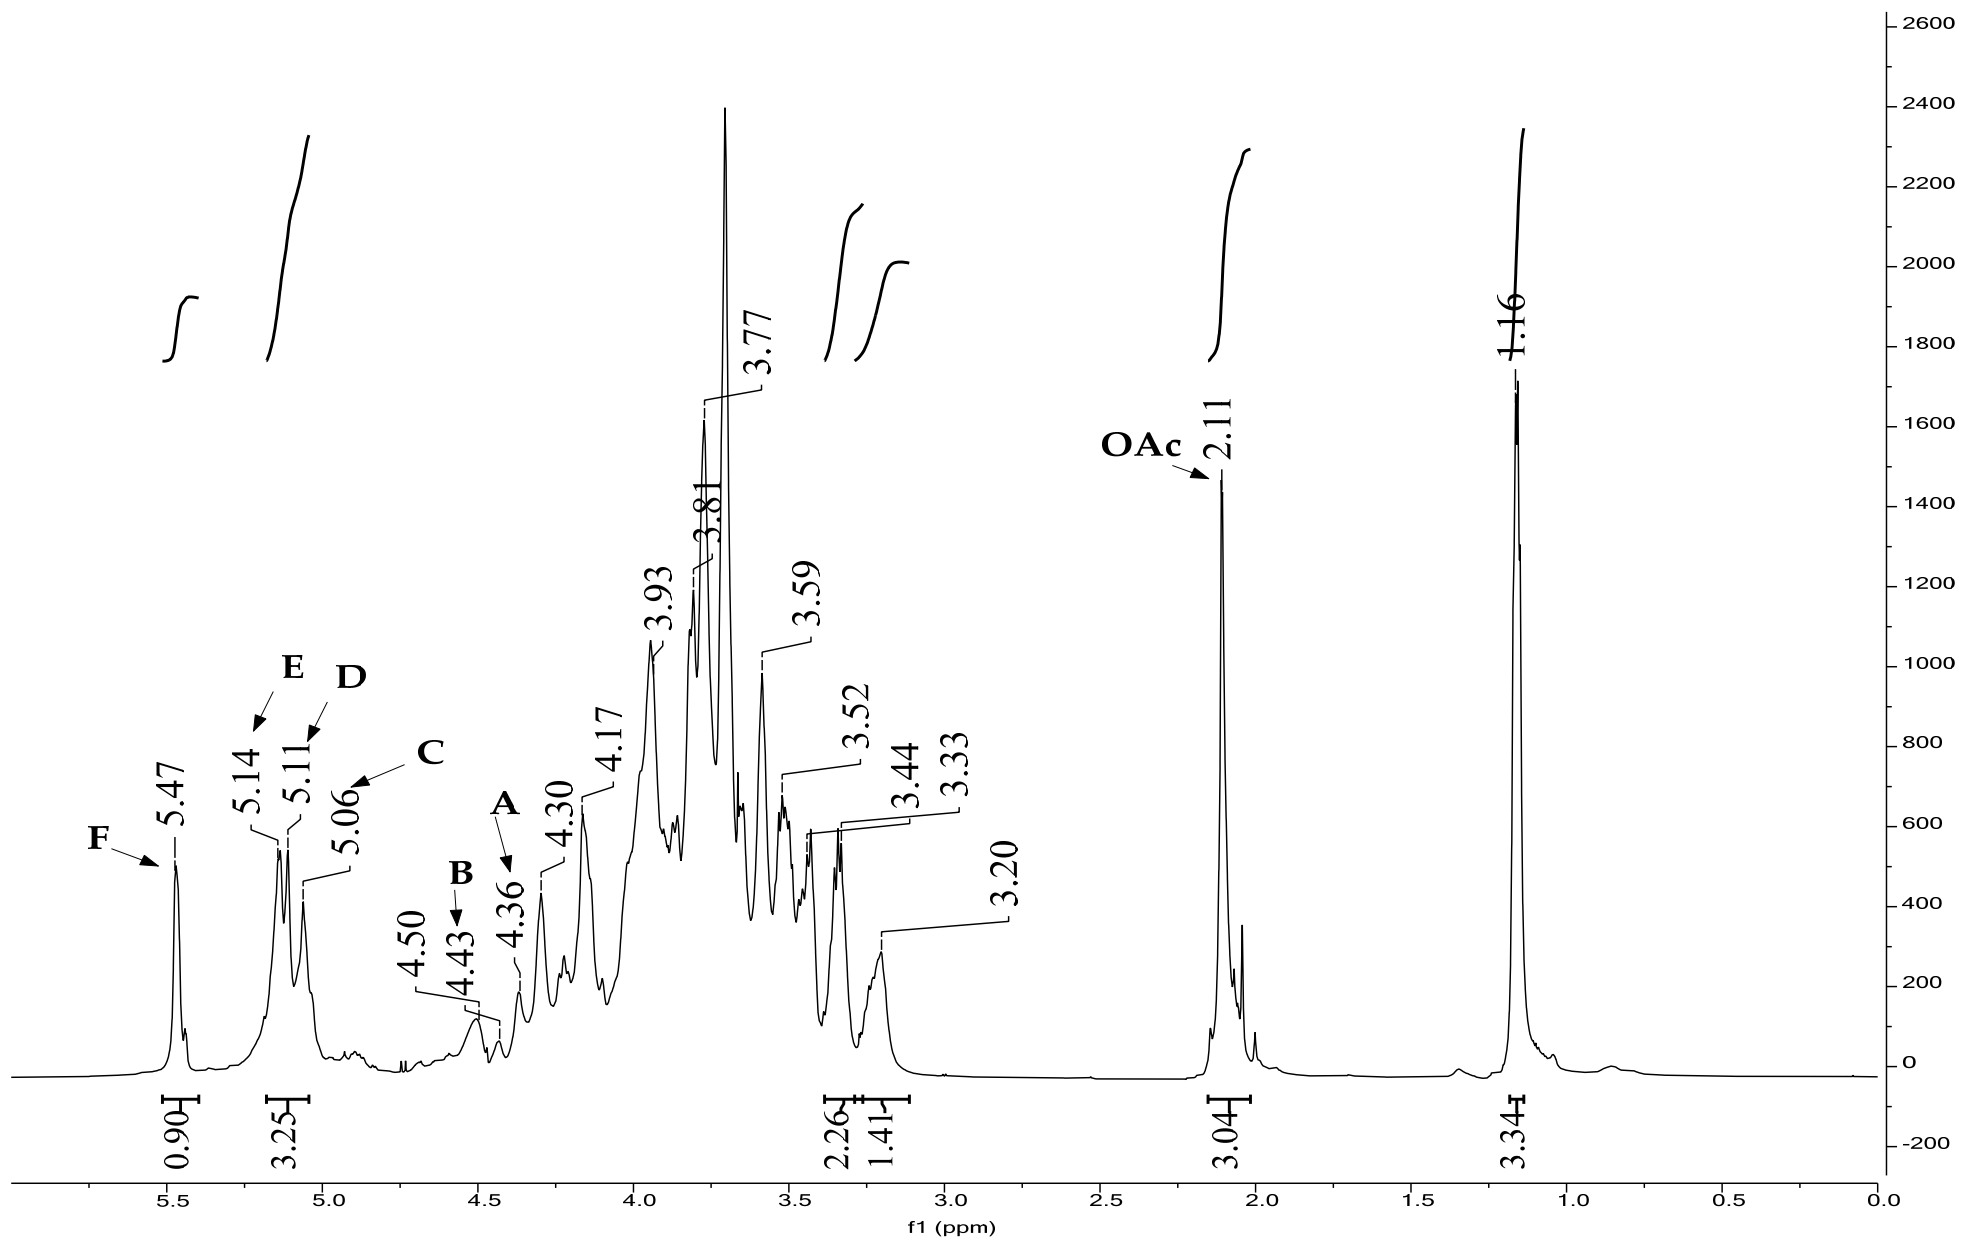

Figure S4. Full  $^1\text{H}$  NMR spectrum (800 MHz) of TFP-F1 ( $\text{D}_2\text{O}$ , 323K).

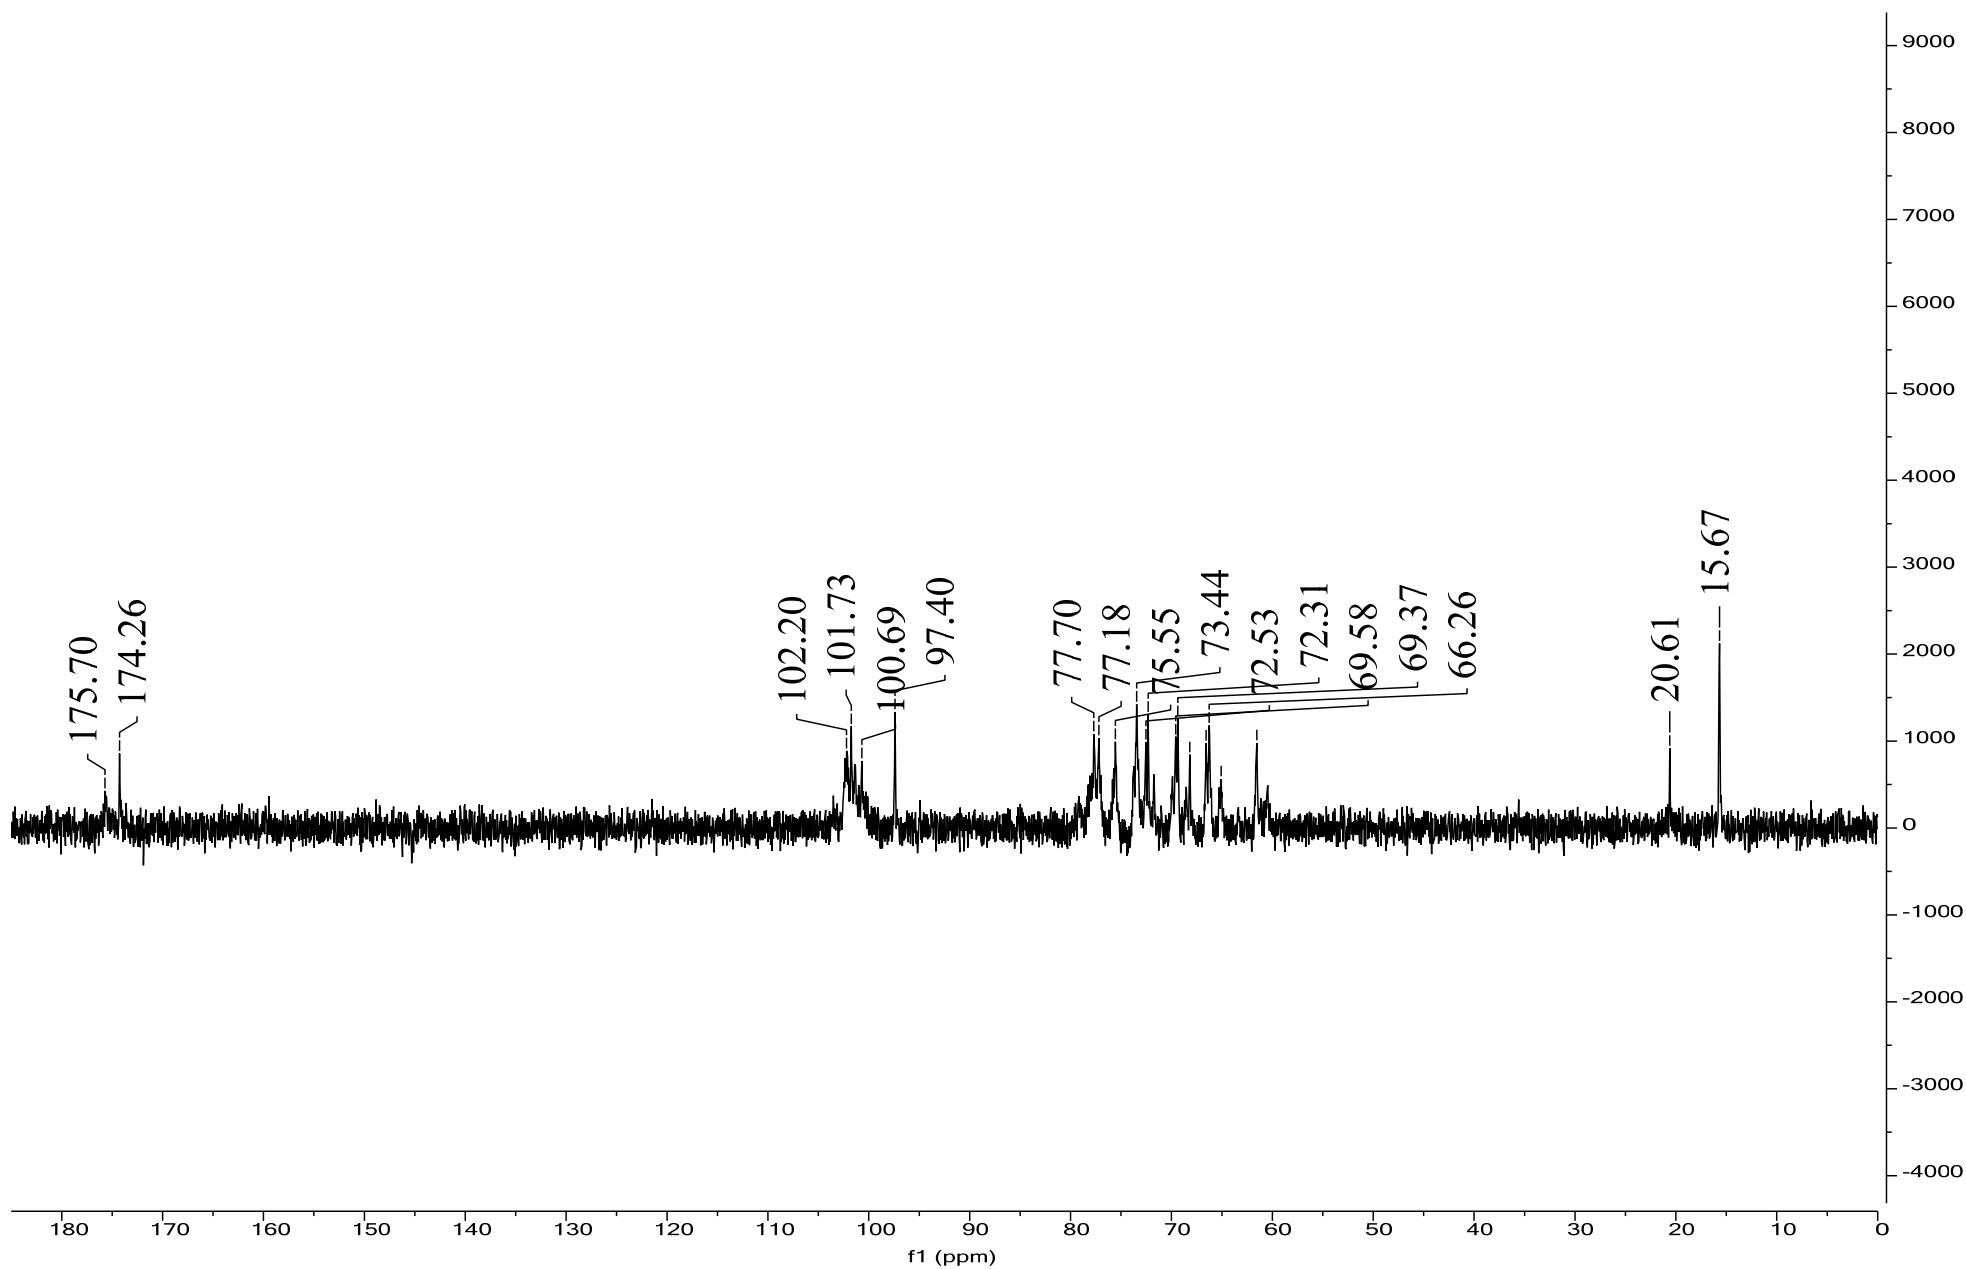

**Fig. S5a.** Full  $^{13}\text{C}$  NMR spectrum (160 MHz) of TFP-F1 ( $\text{D}_2\text{O}$ , 323K).



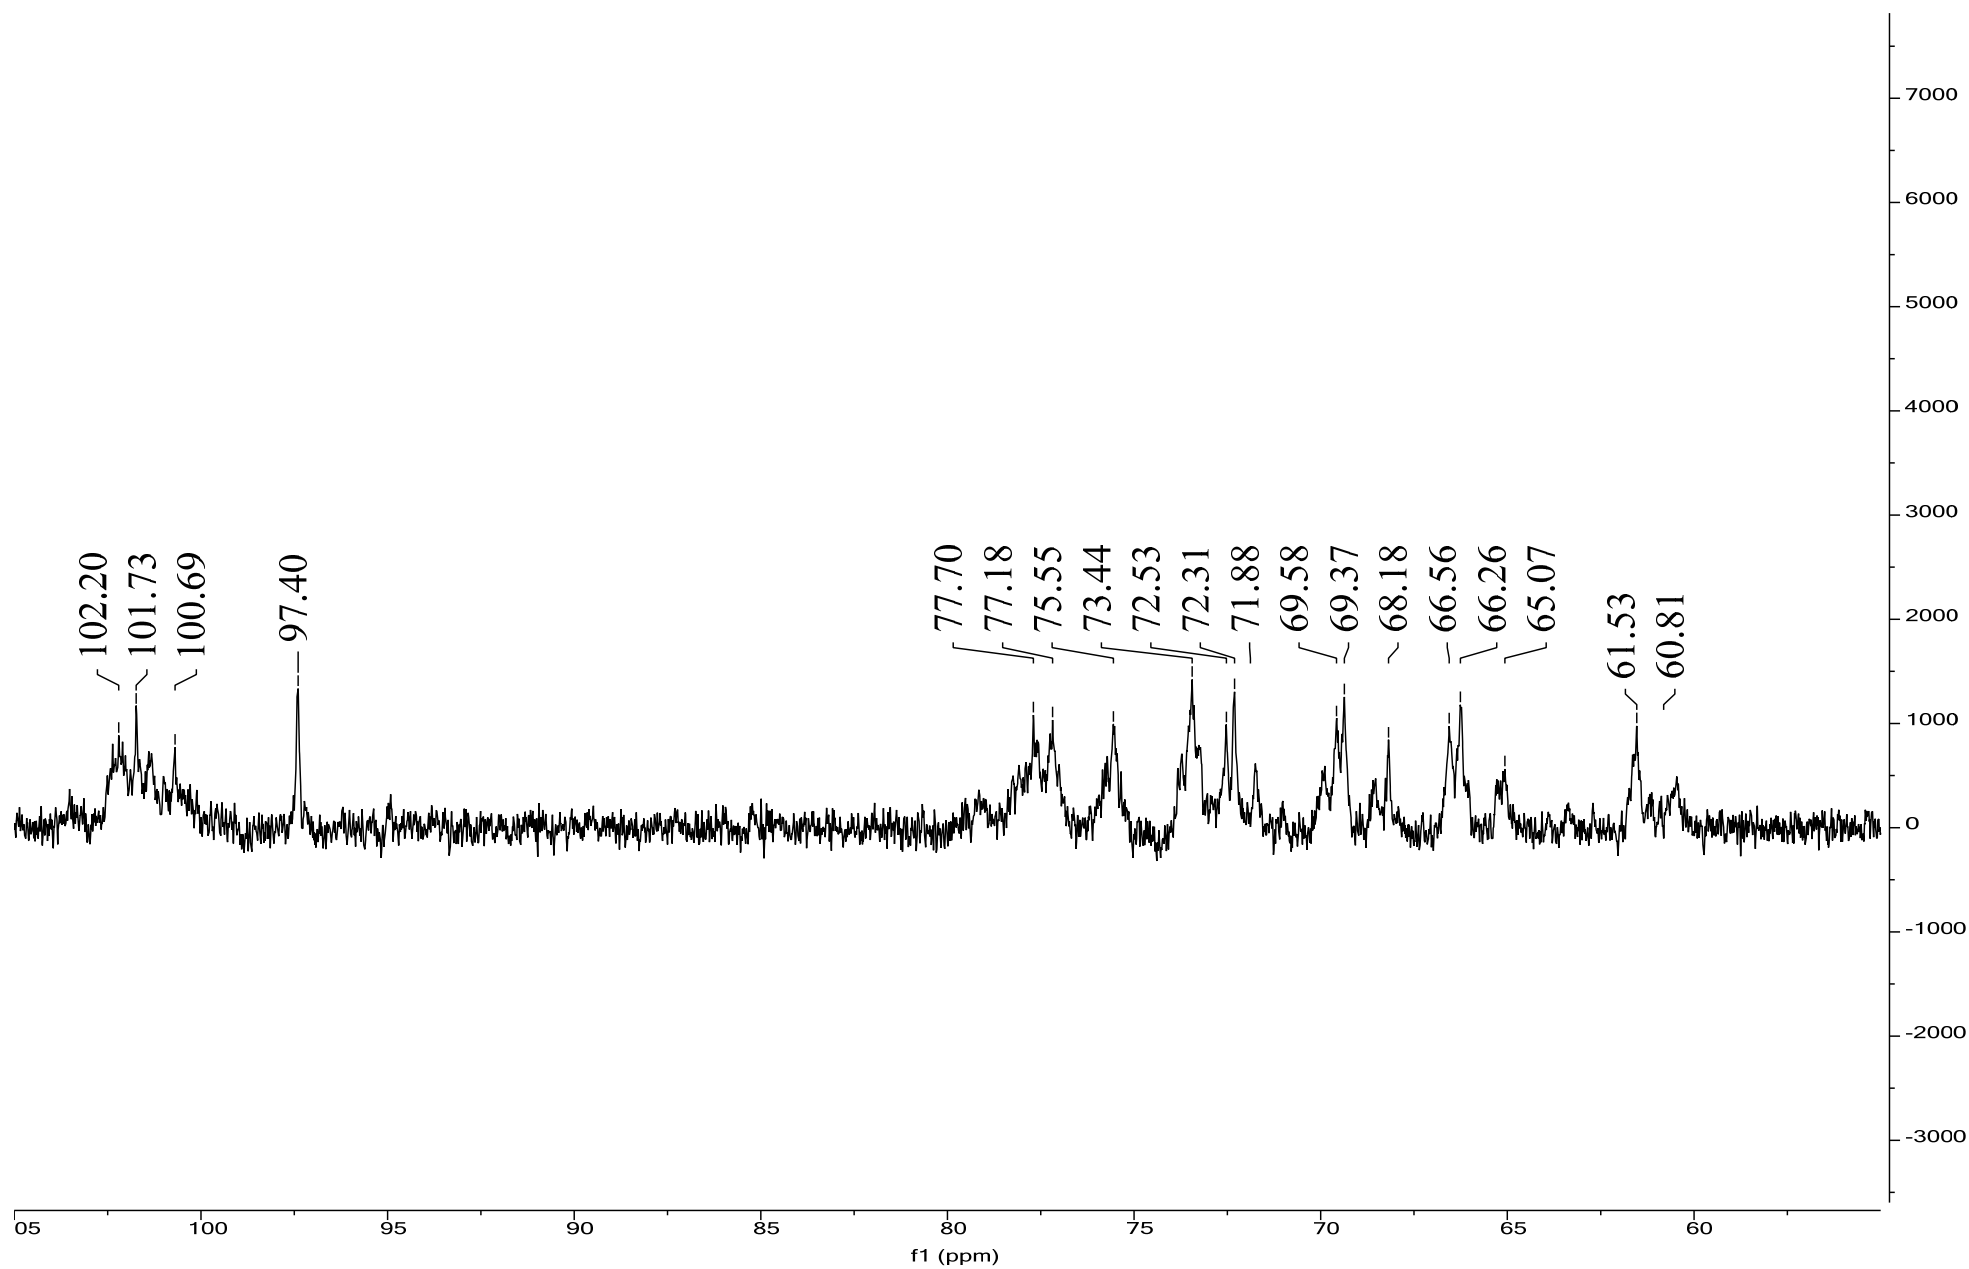

**Figure S5b.** Enlarged  $^{13}\text{C}$  NMR spectrum (from 55 to 105 ppm) (160 MHz) of TFP-F1

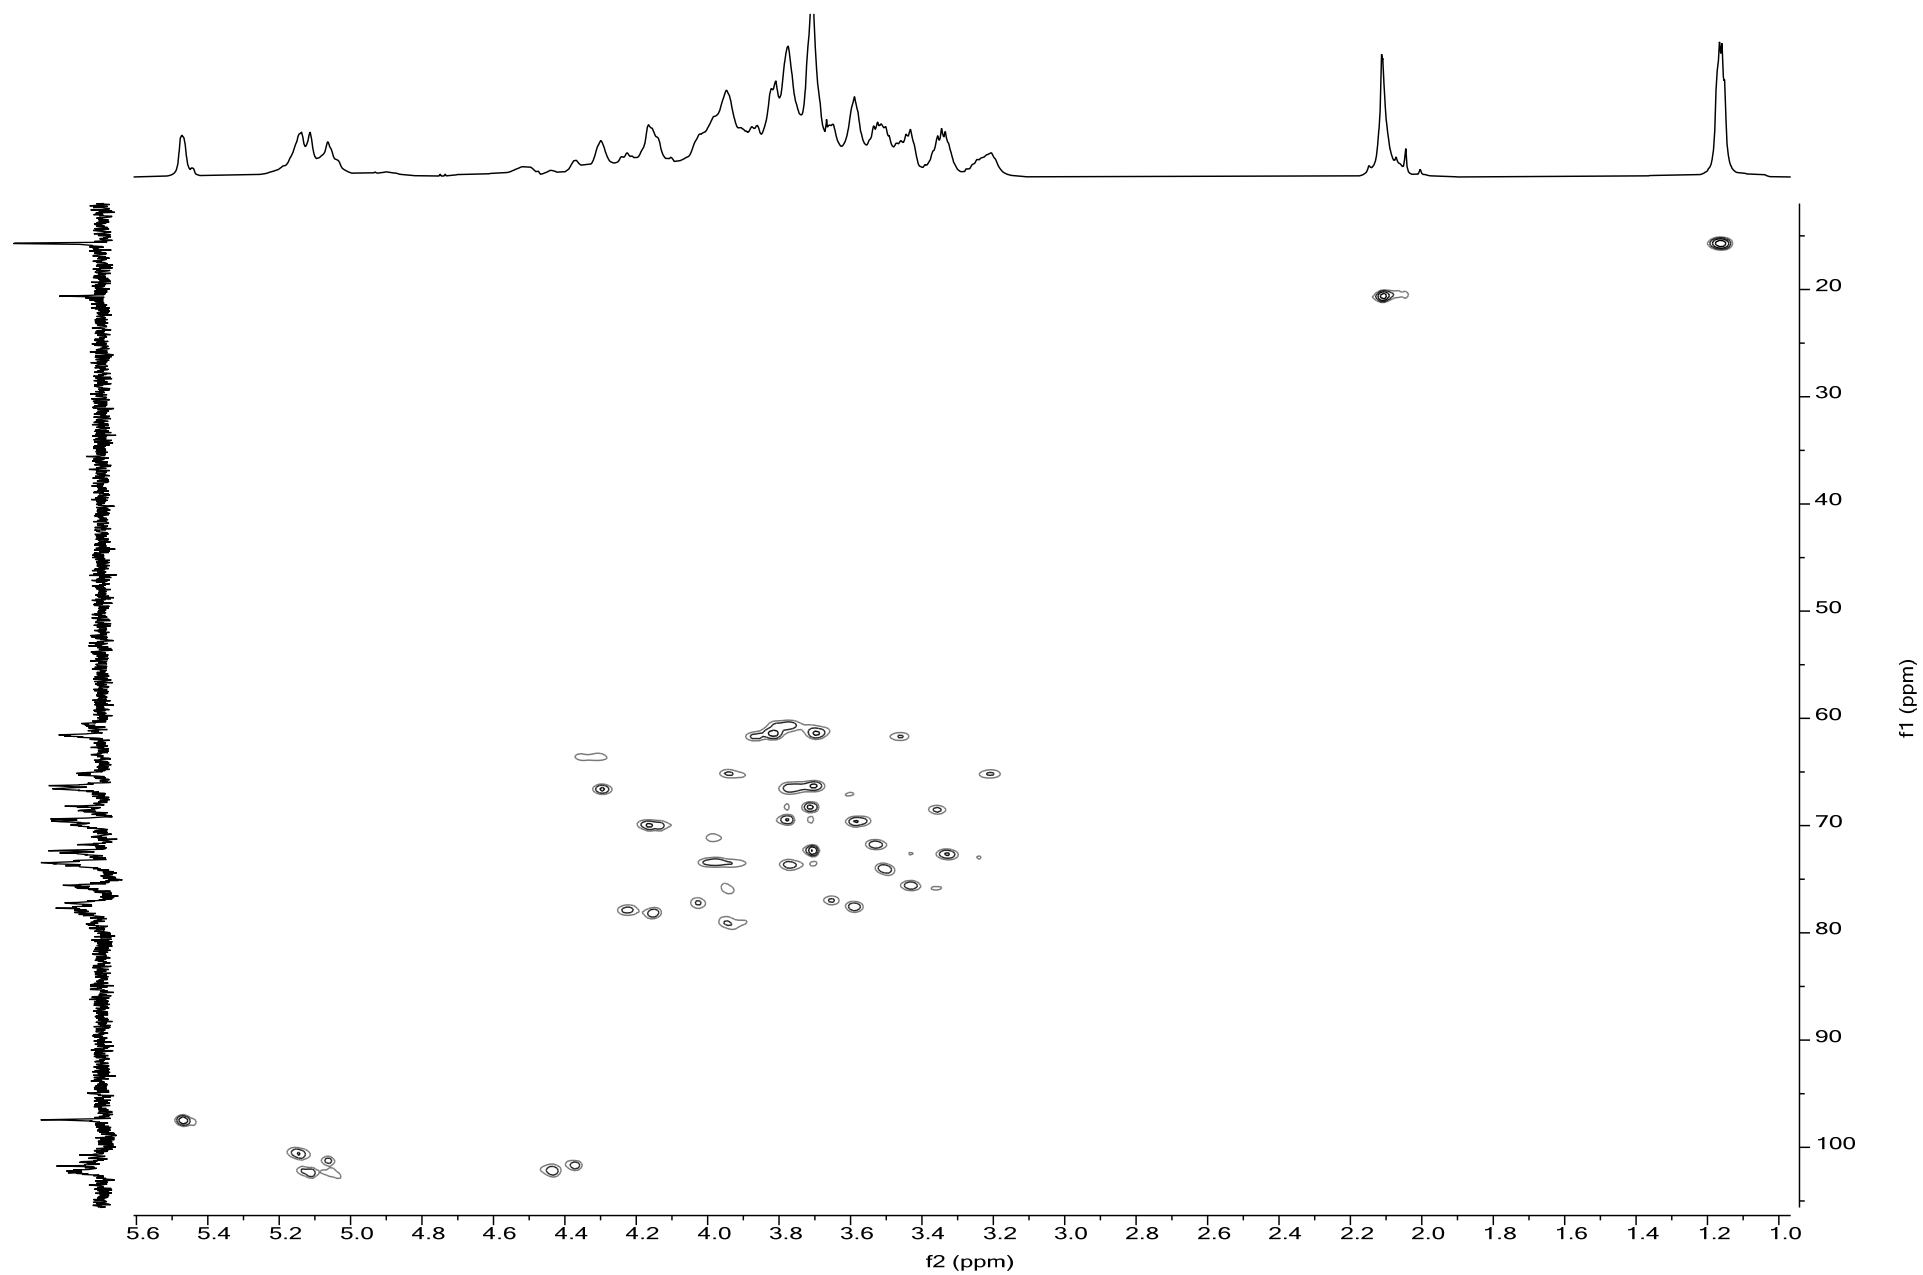

**Figure S6a.** Full HSQC spectrum of TFP-F1.

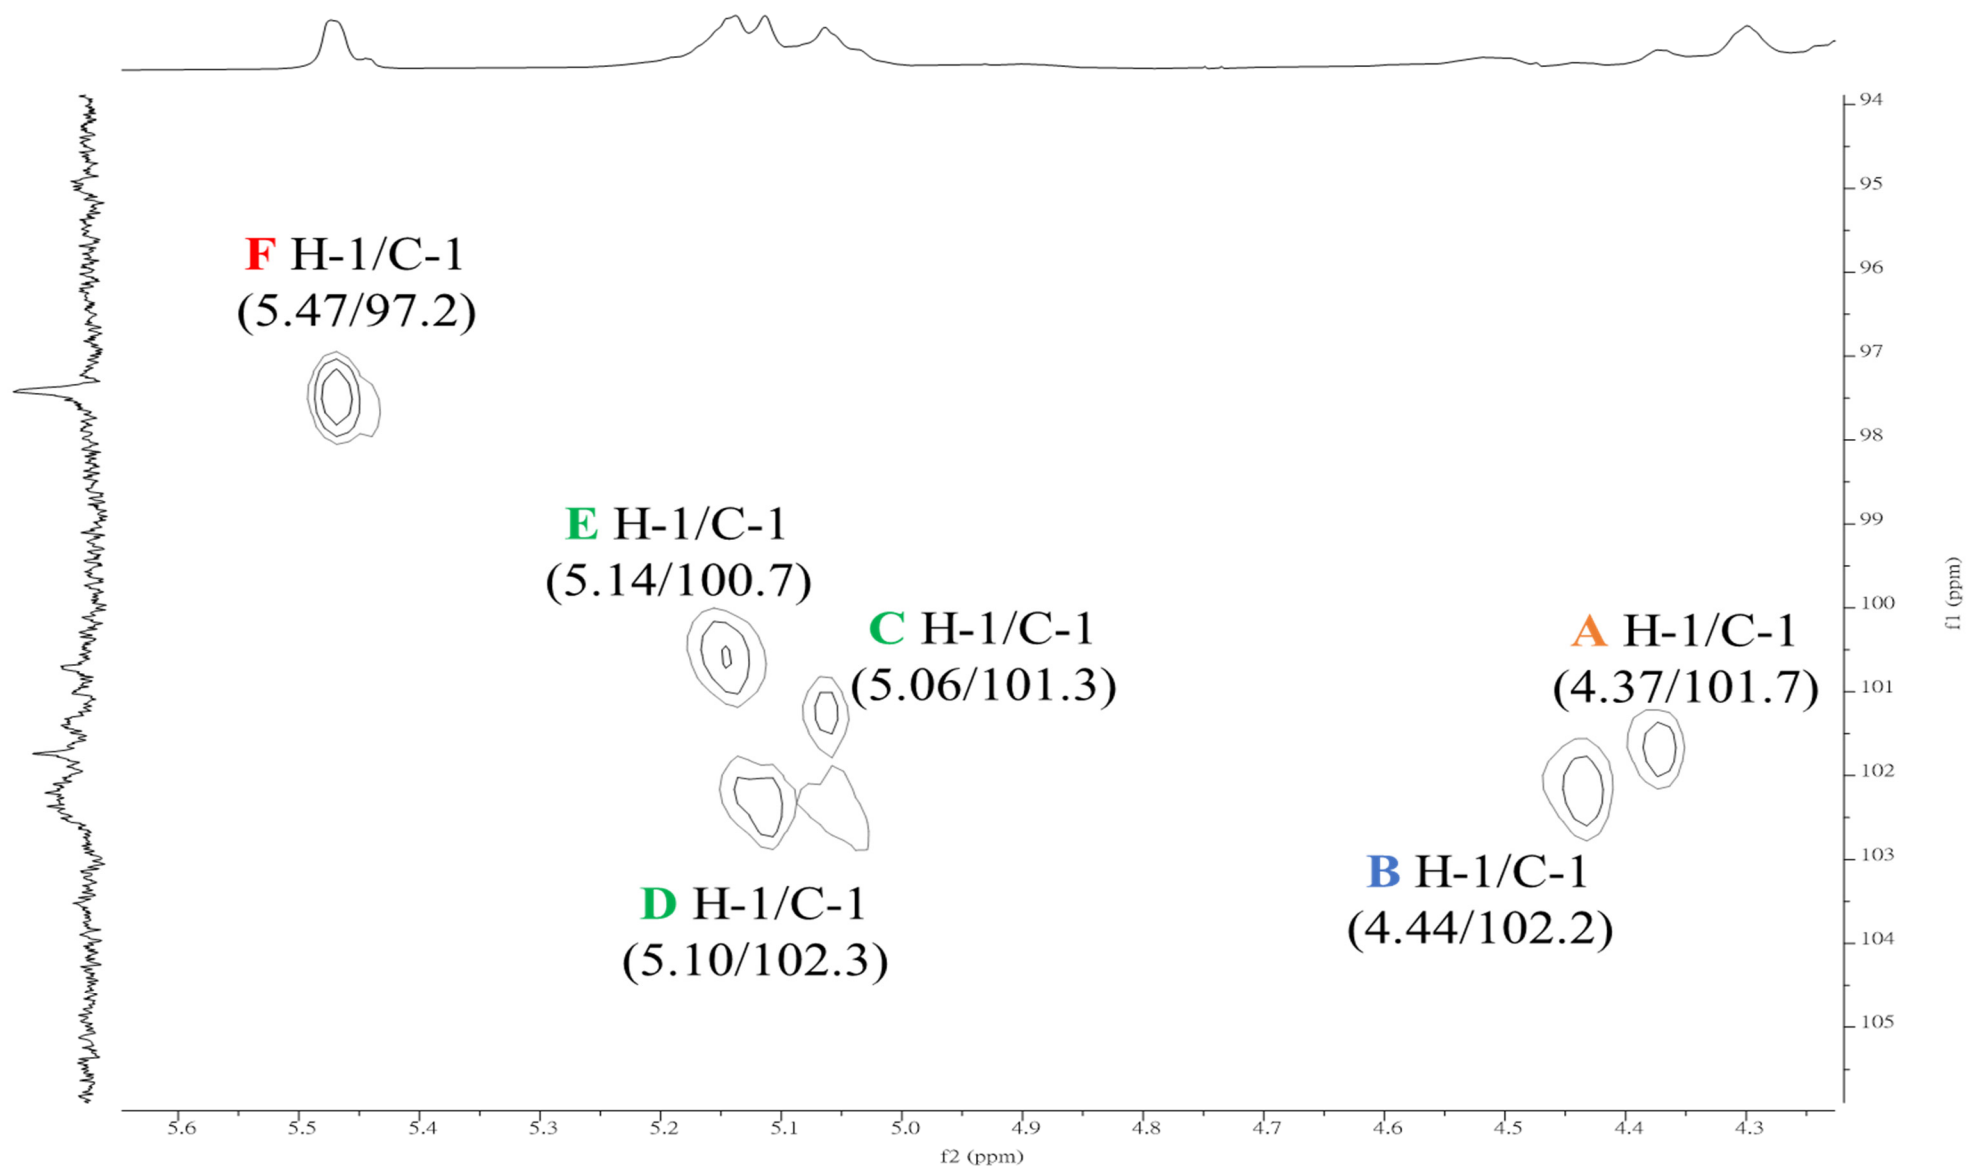

**Figure S6b.** Enlarged HSQC spectrum (I) of TFP-F1.

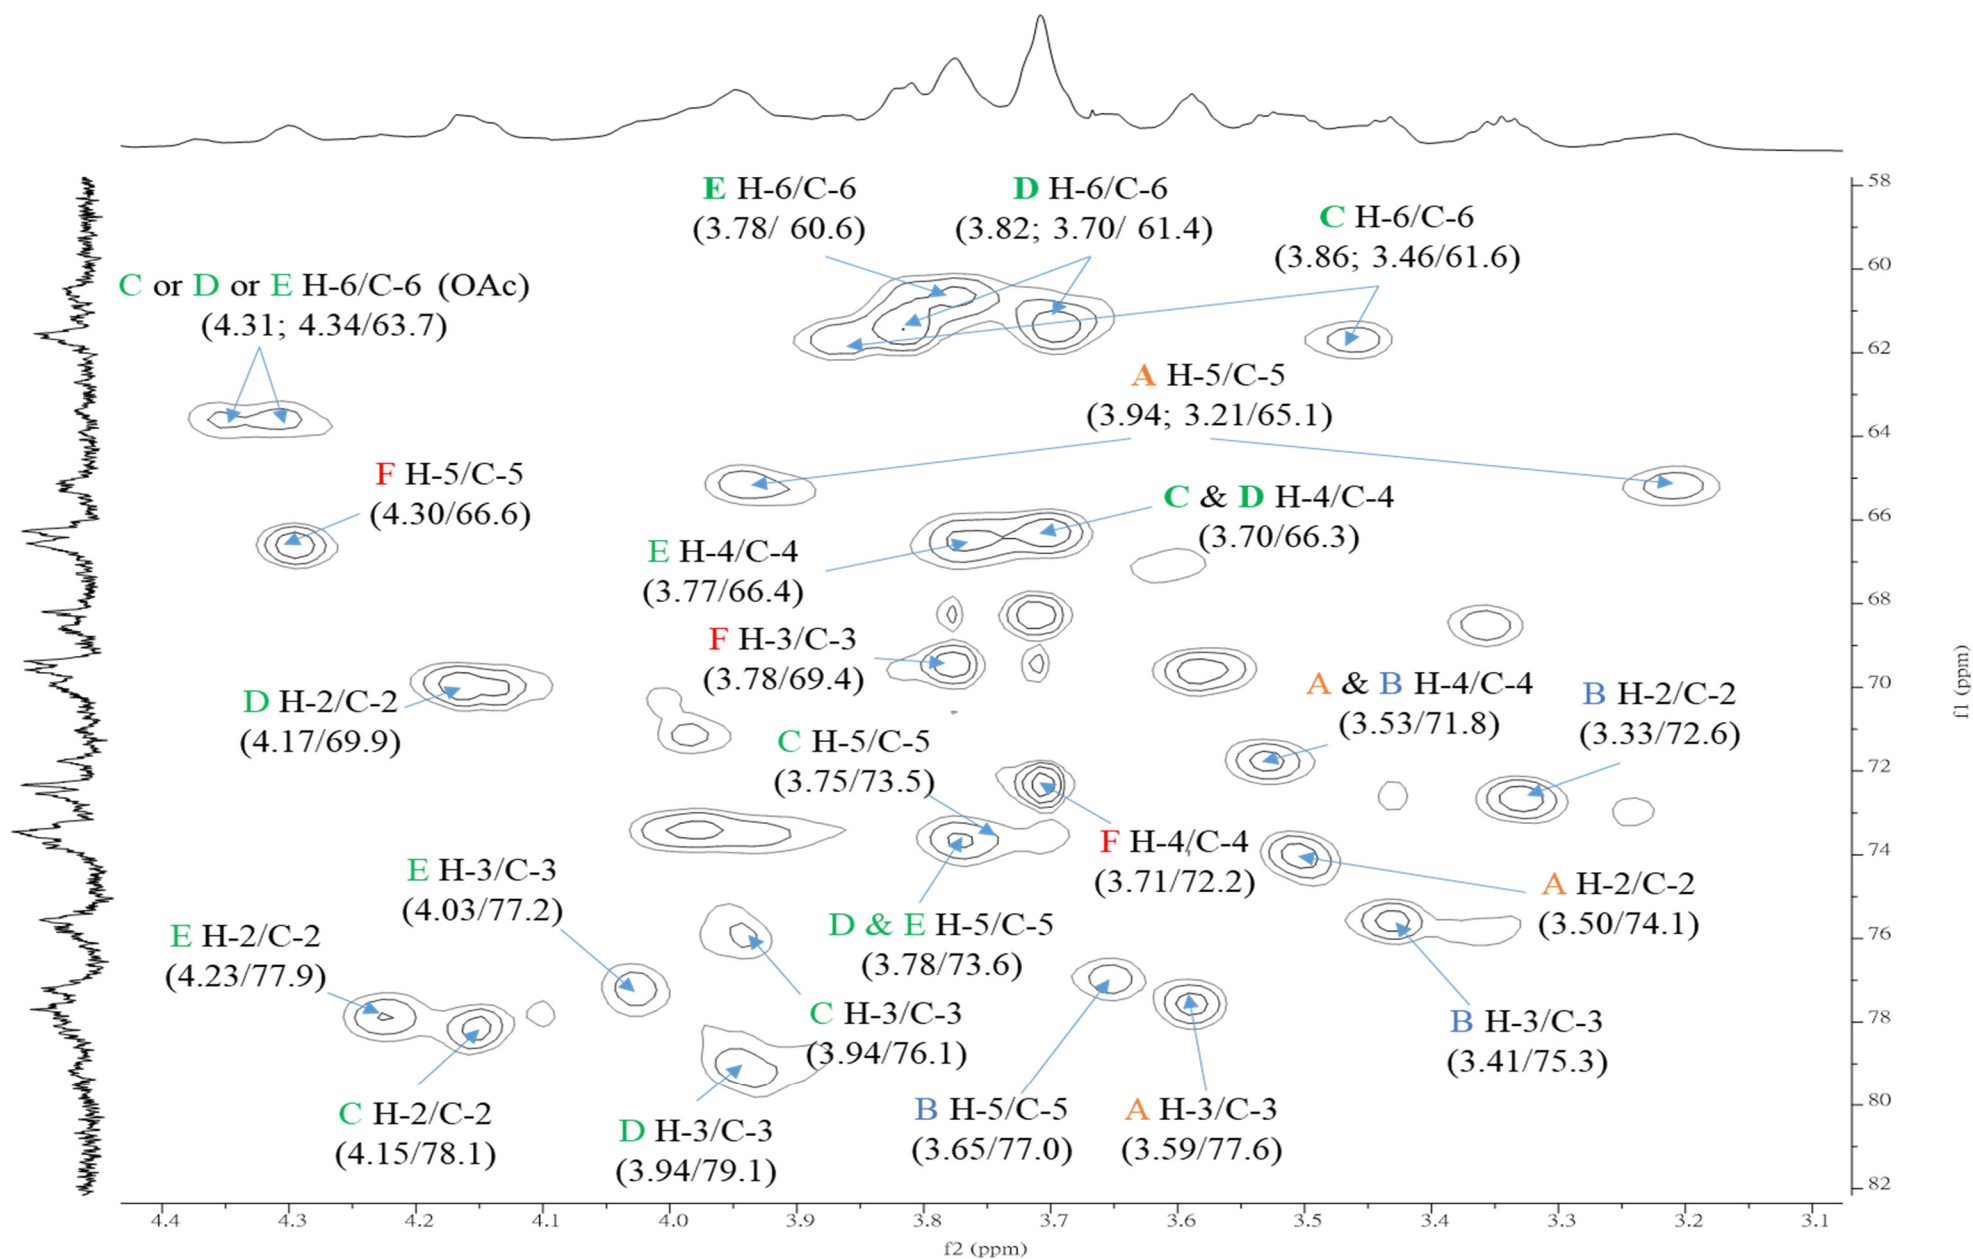

Figure S6c. Enlarged HSQC spectrum (II) of TFP-F1.

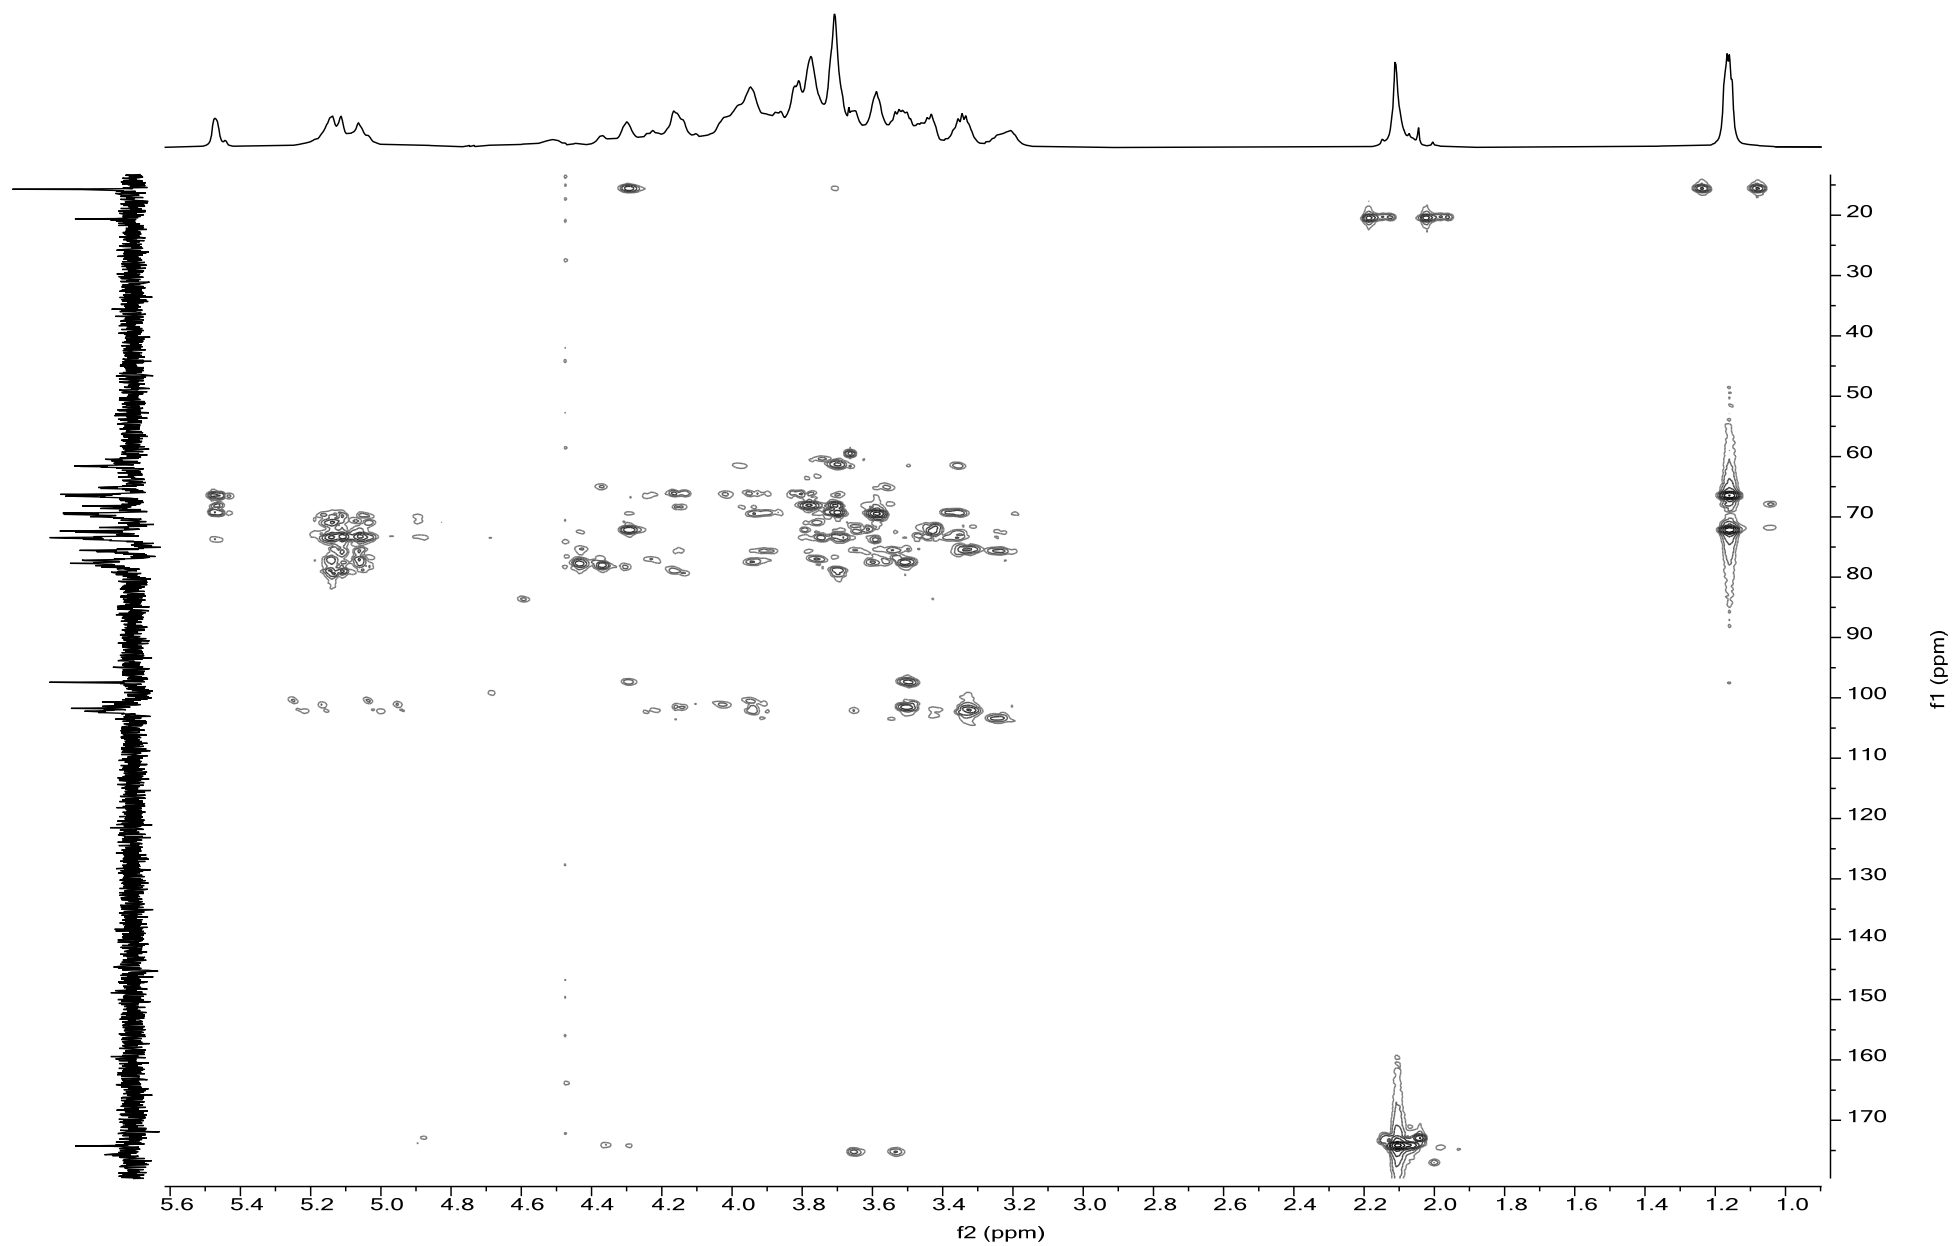

Figure S7a. Full HMBC spectrum of TFP-F1.

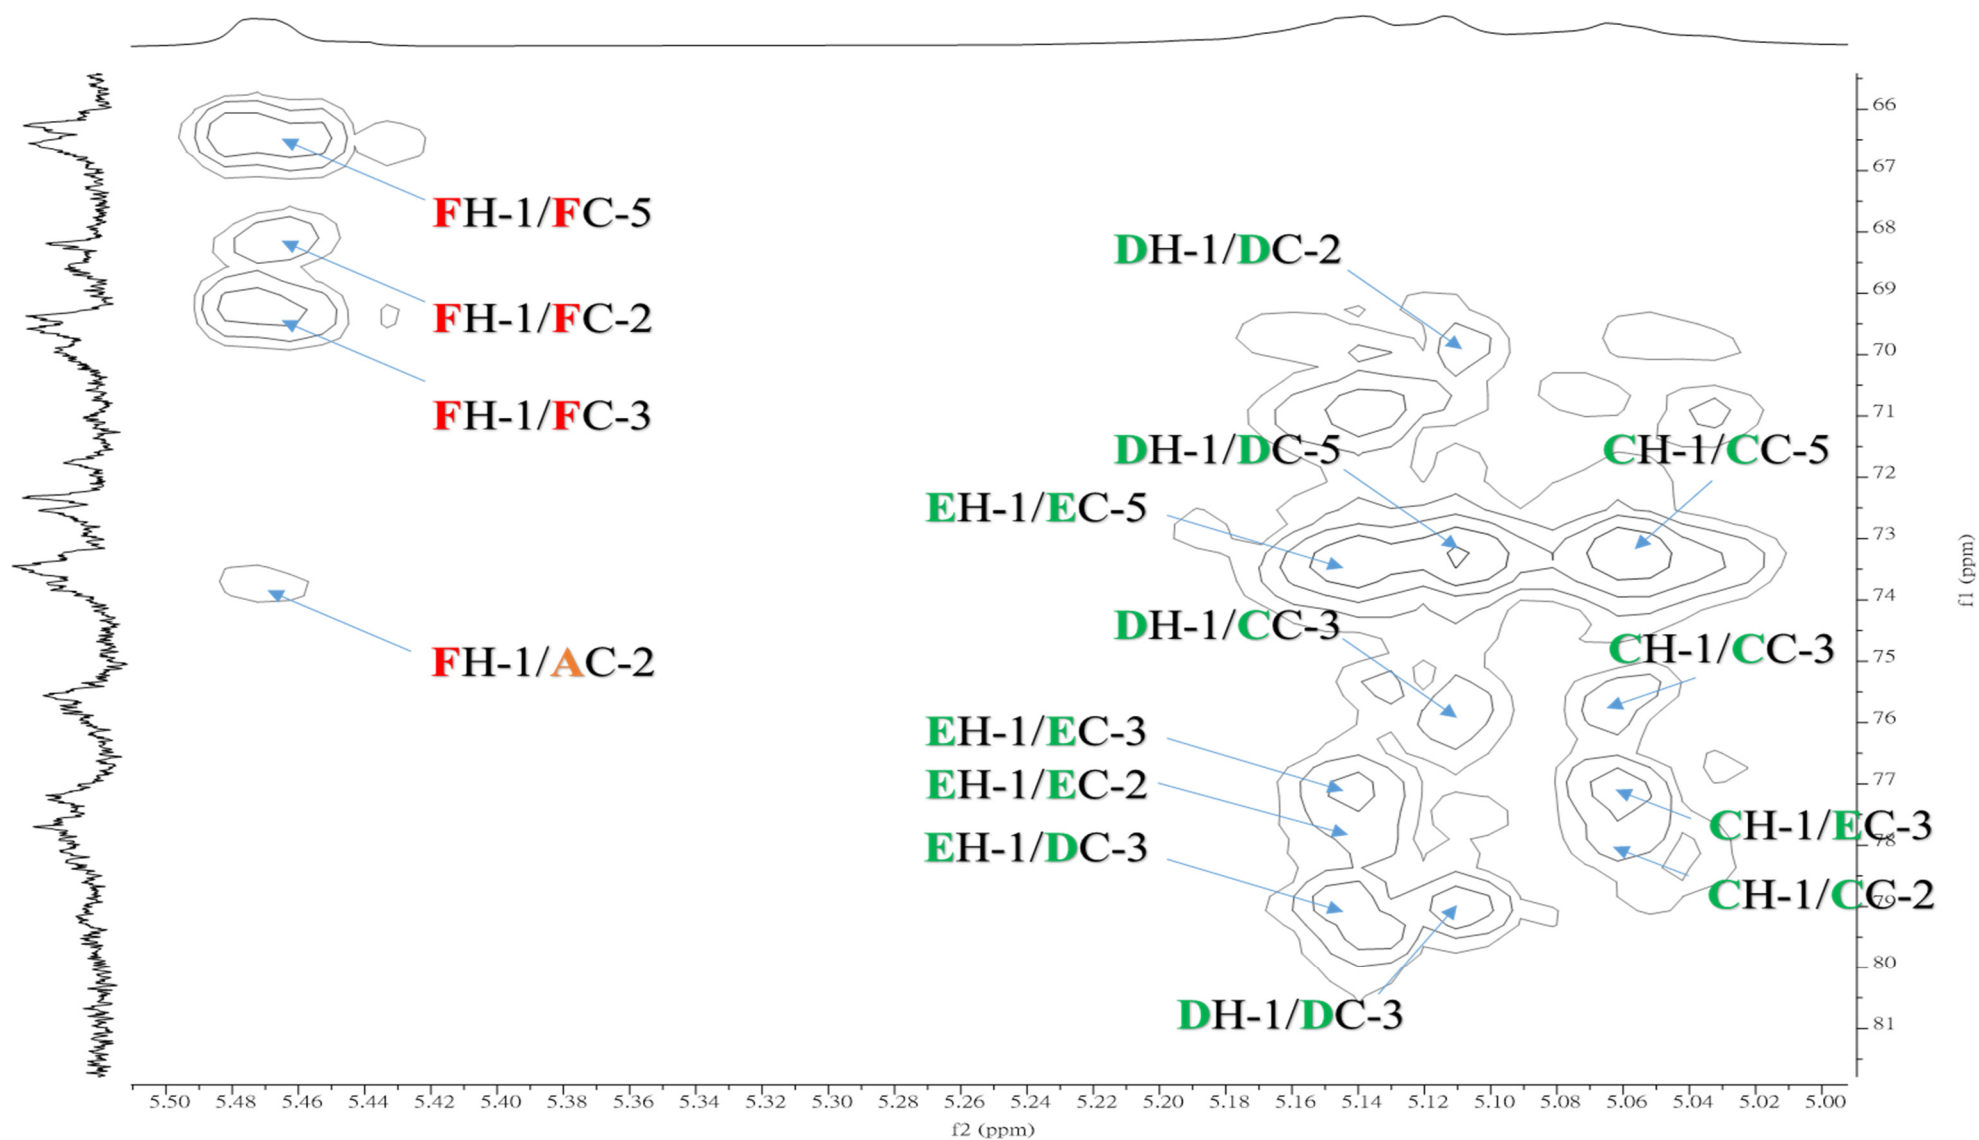

Figure S7b. Enlarged HMBC spectrum (I) of TFP-F1.

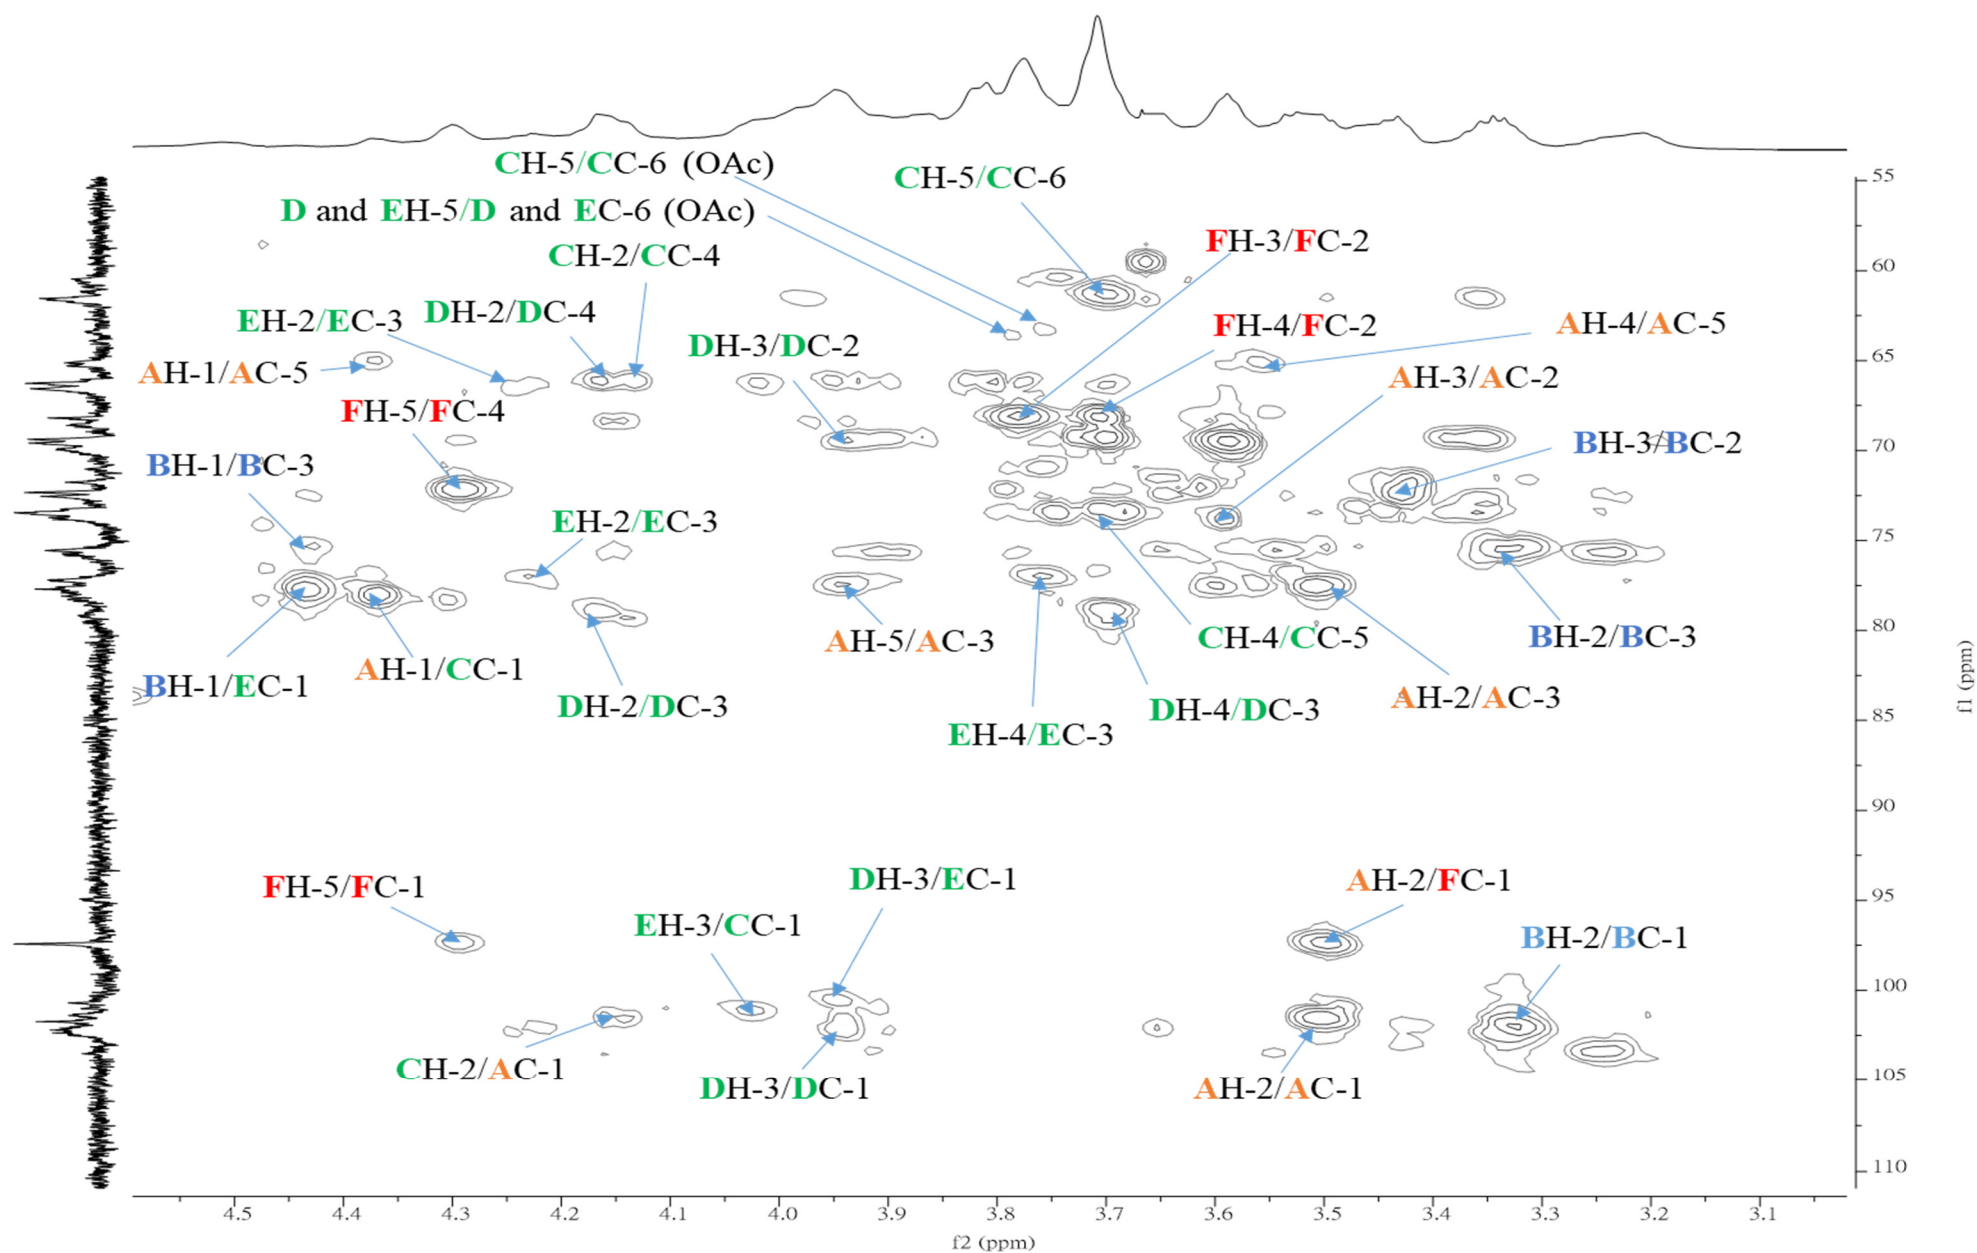

Figure S7c. Enlarged HMBC spectrum (II) of TFP-F1.

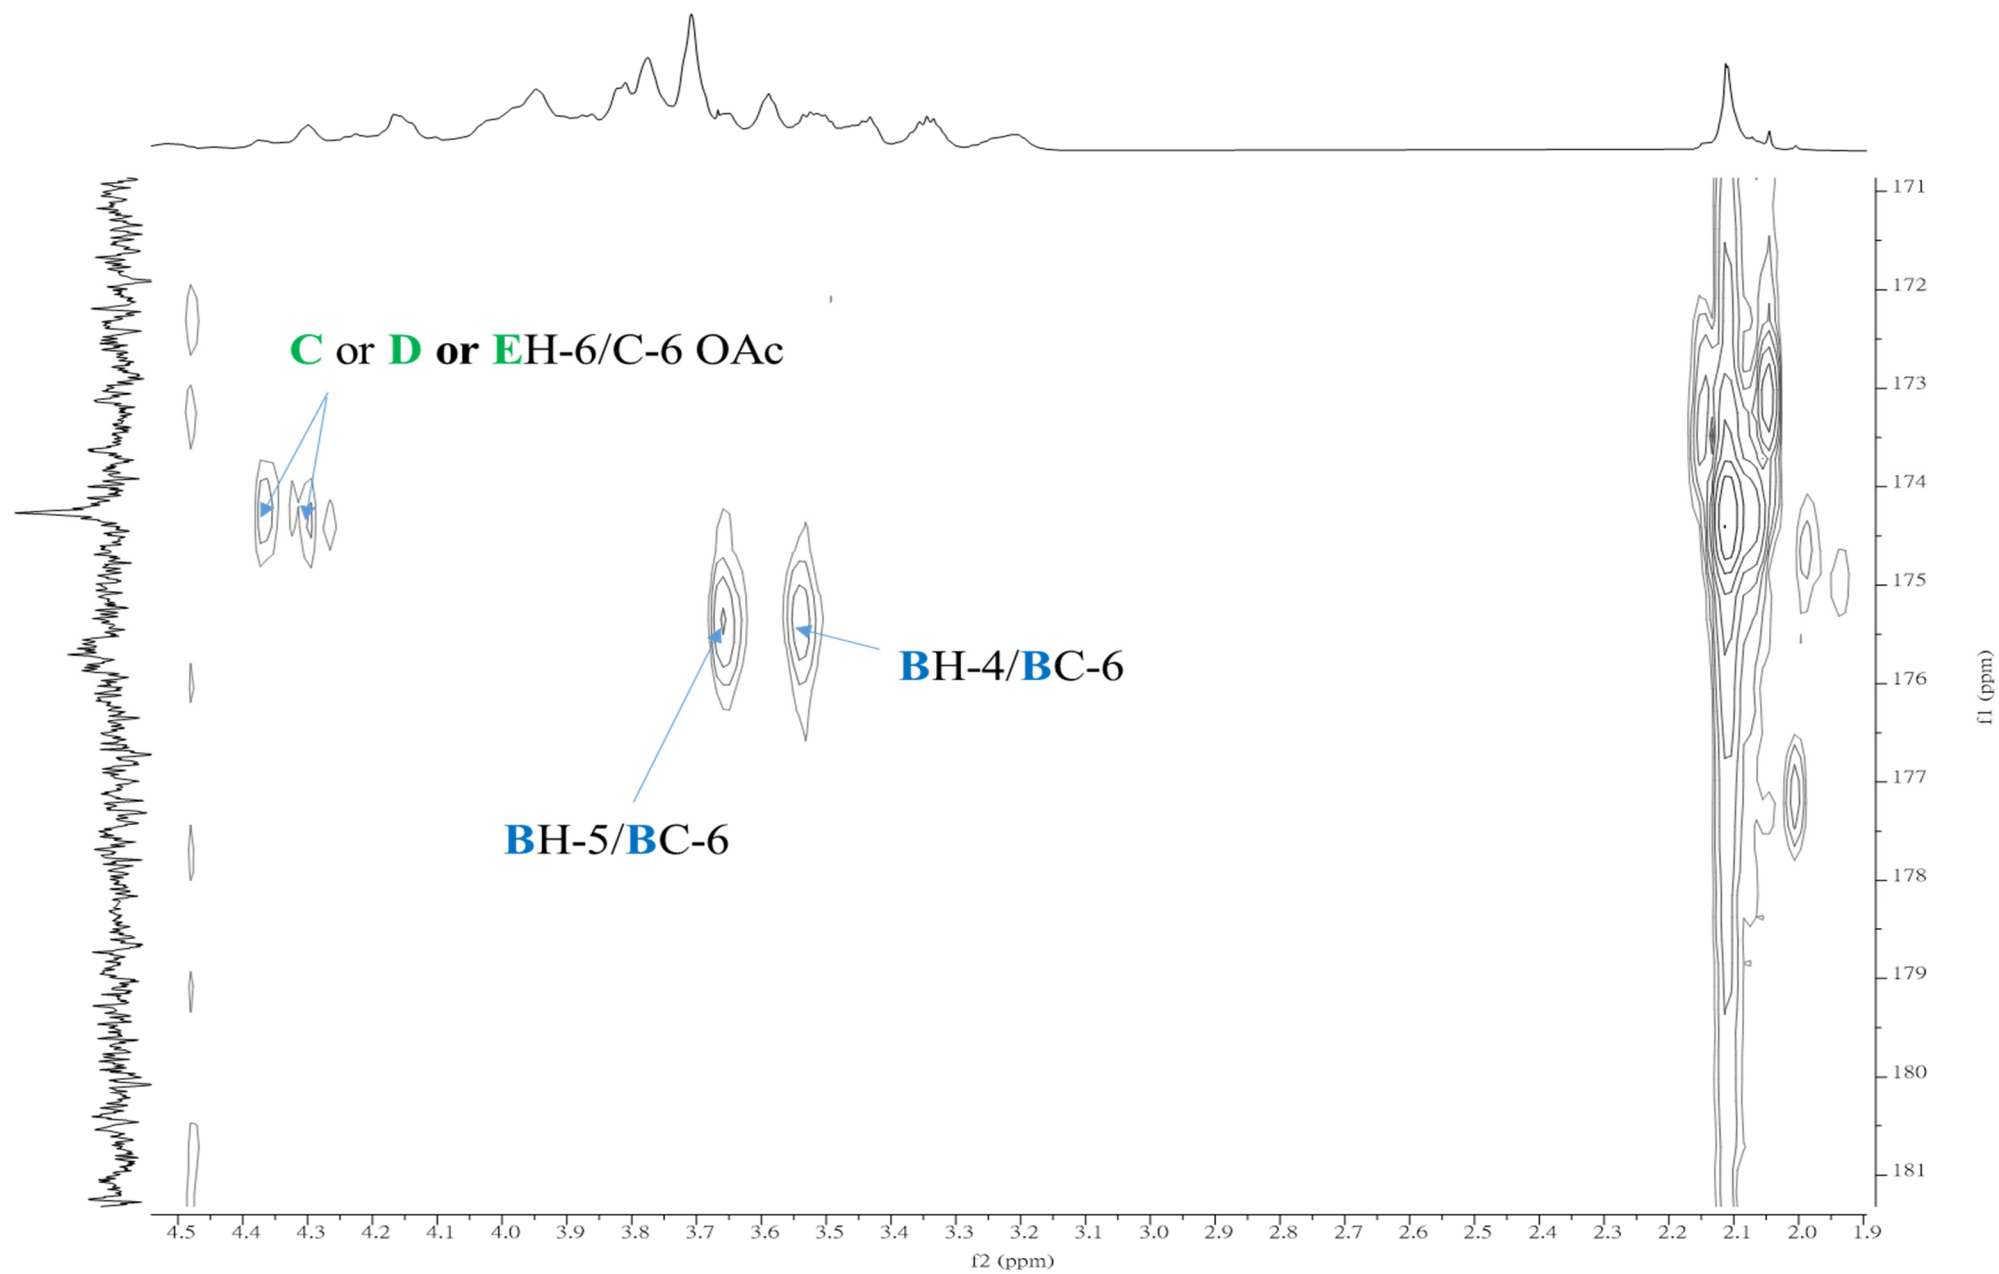

Figure S7d. Enlarged HMBC spectrum (III) of TFP-F1.



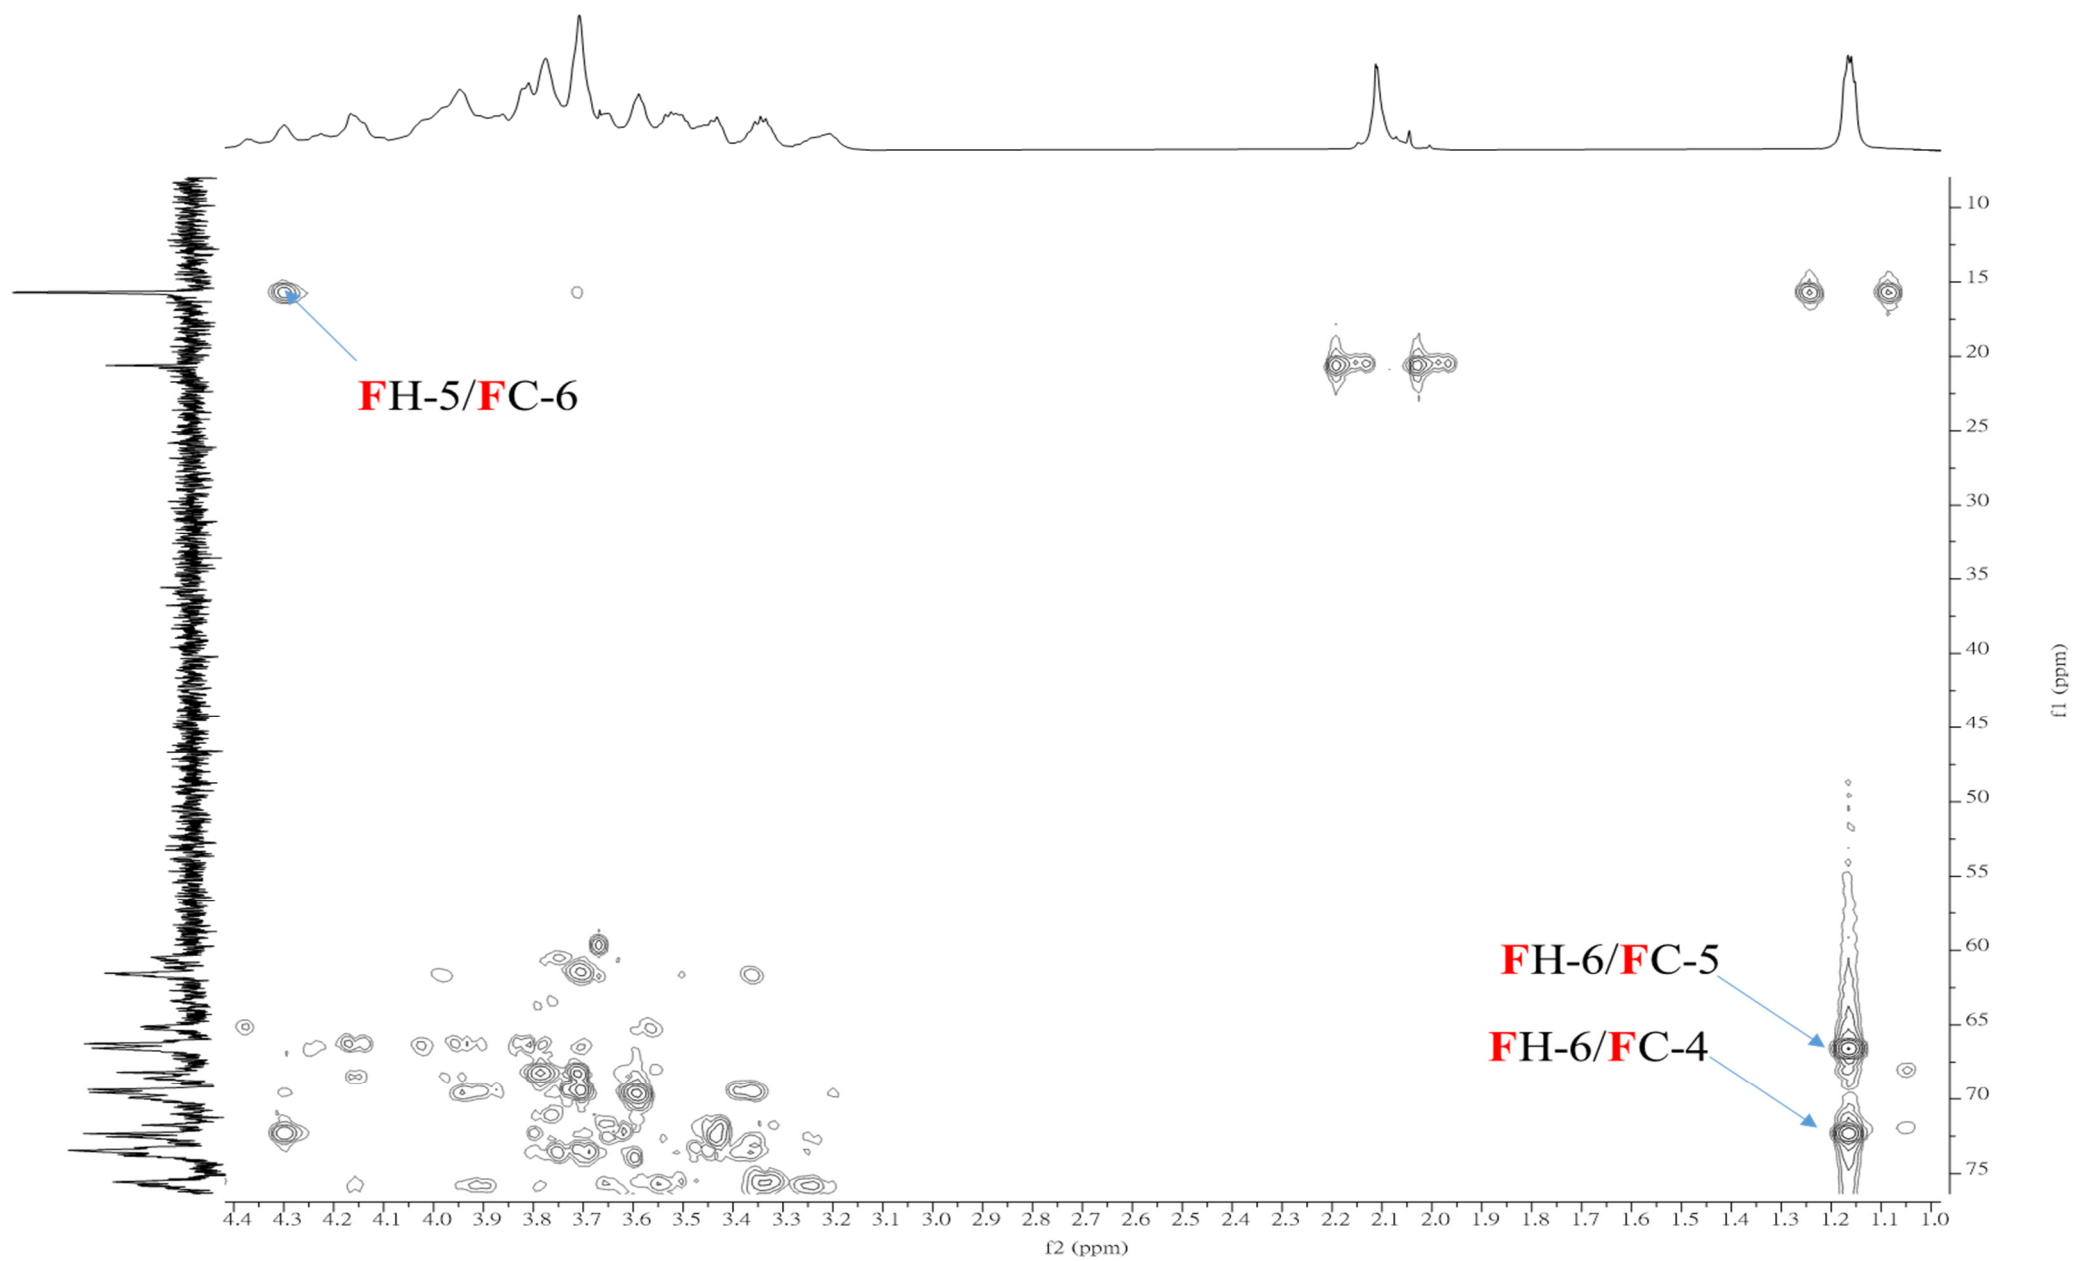

**Figure S7e.** Enlarged HMBC spectrum (IV) of TFP-F1.

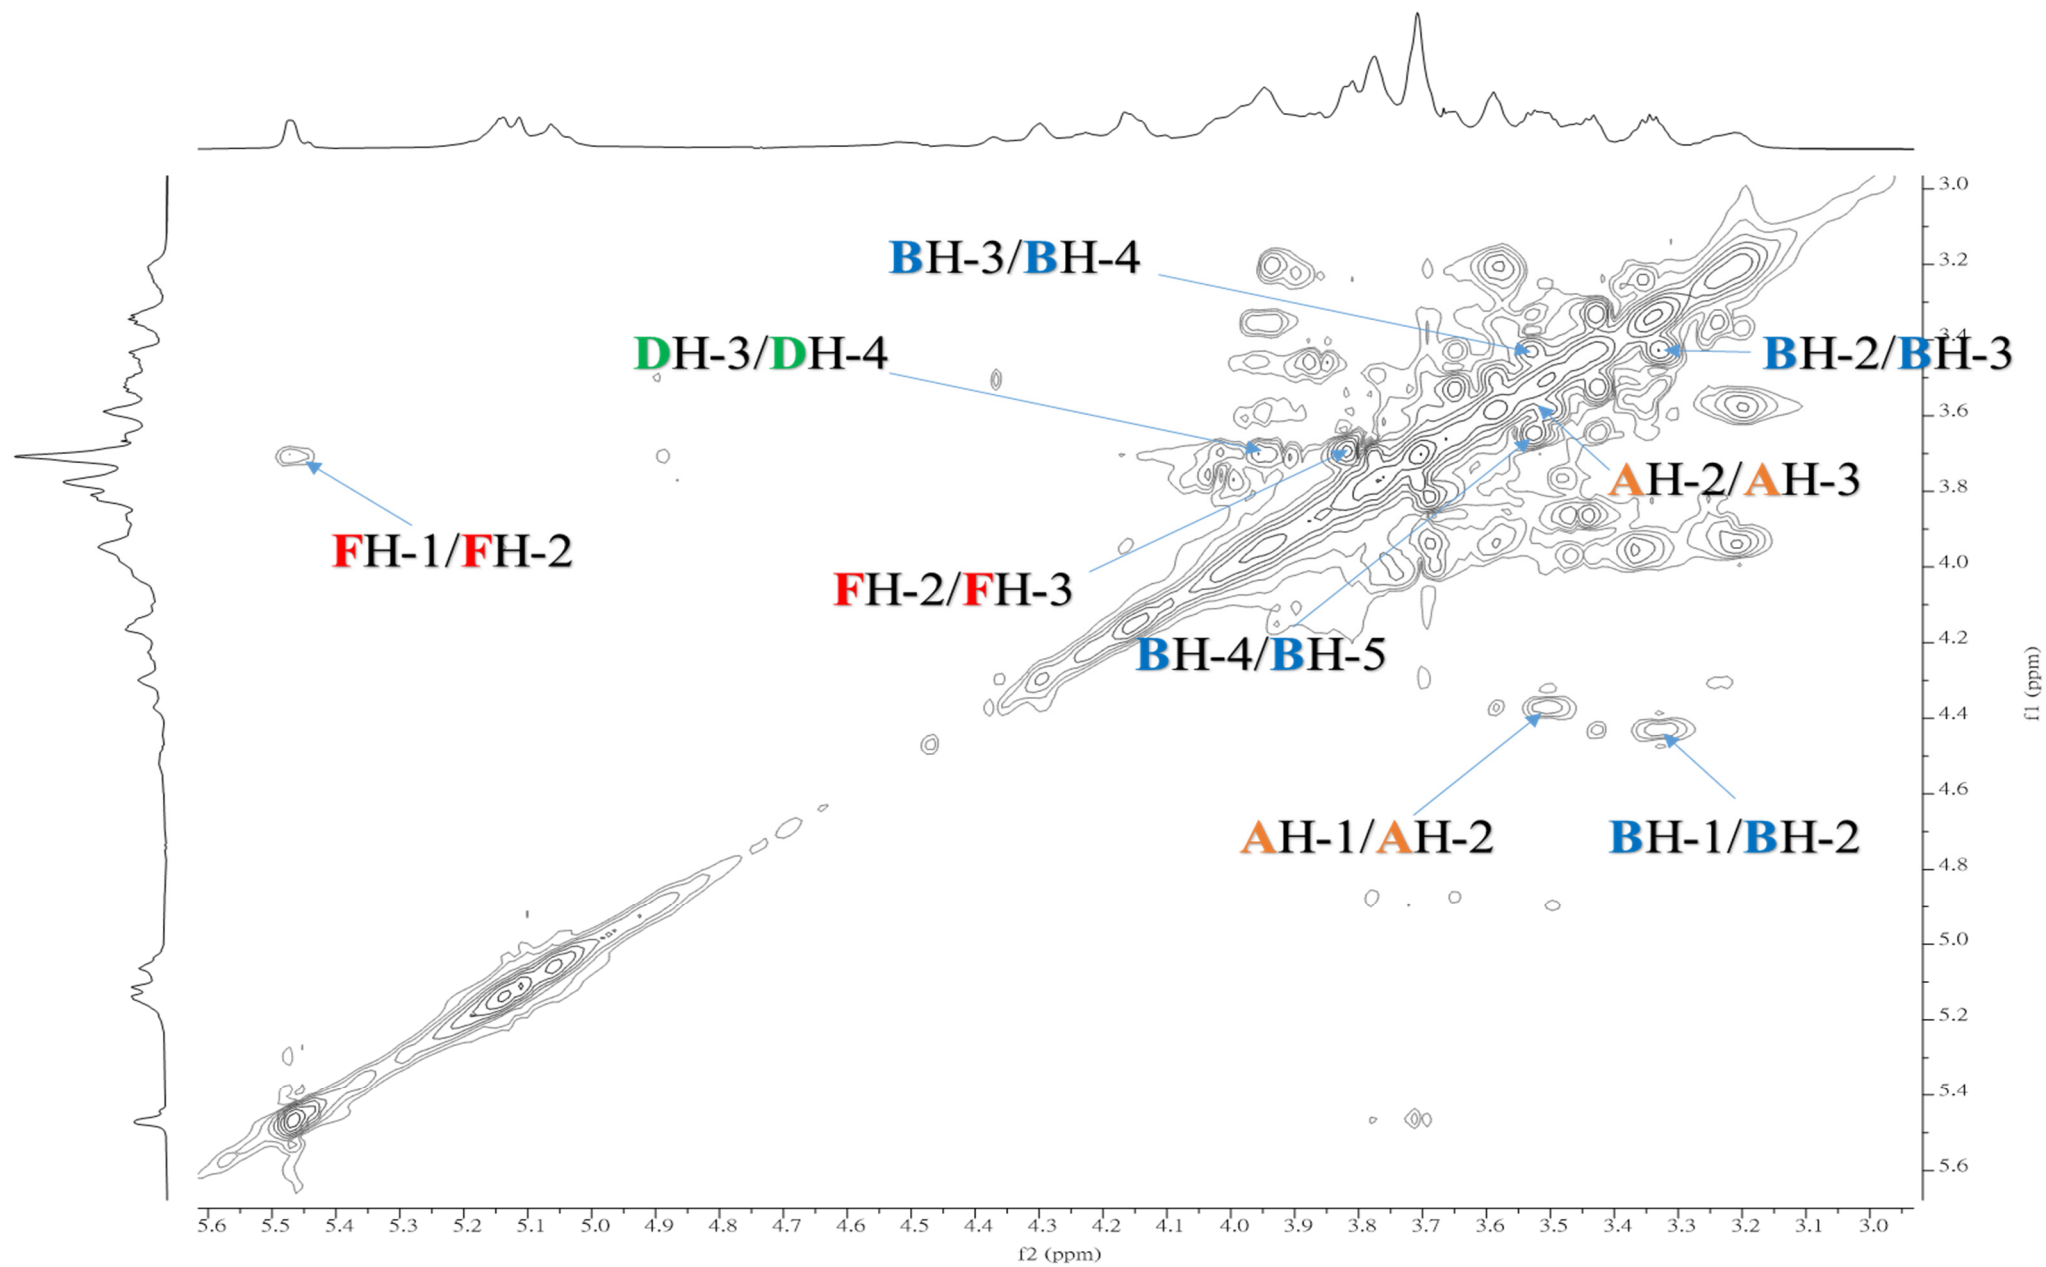

Figure S8. Full COSY spectrum of TFP-F1.

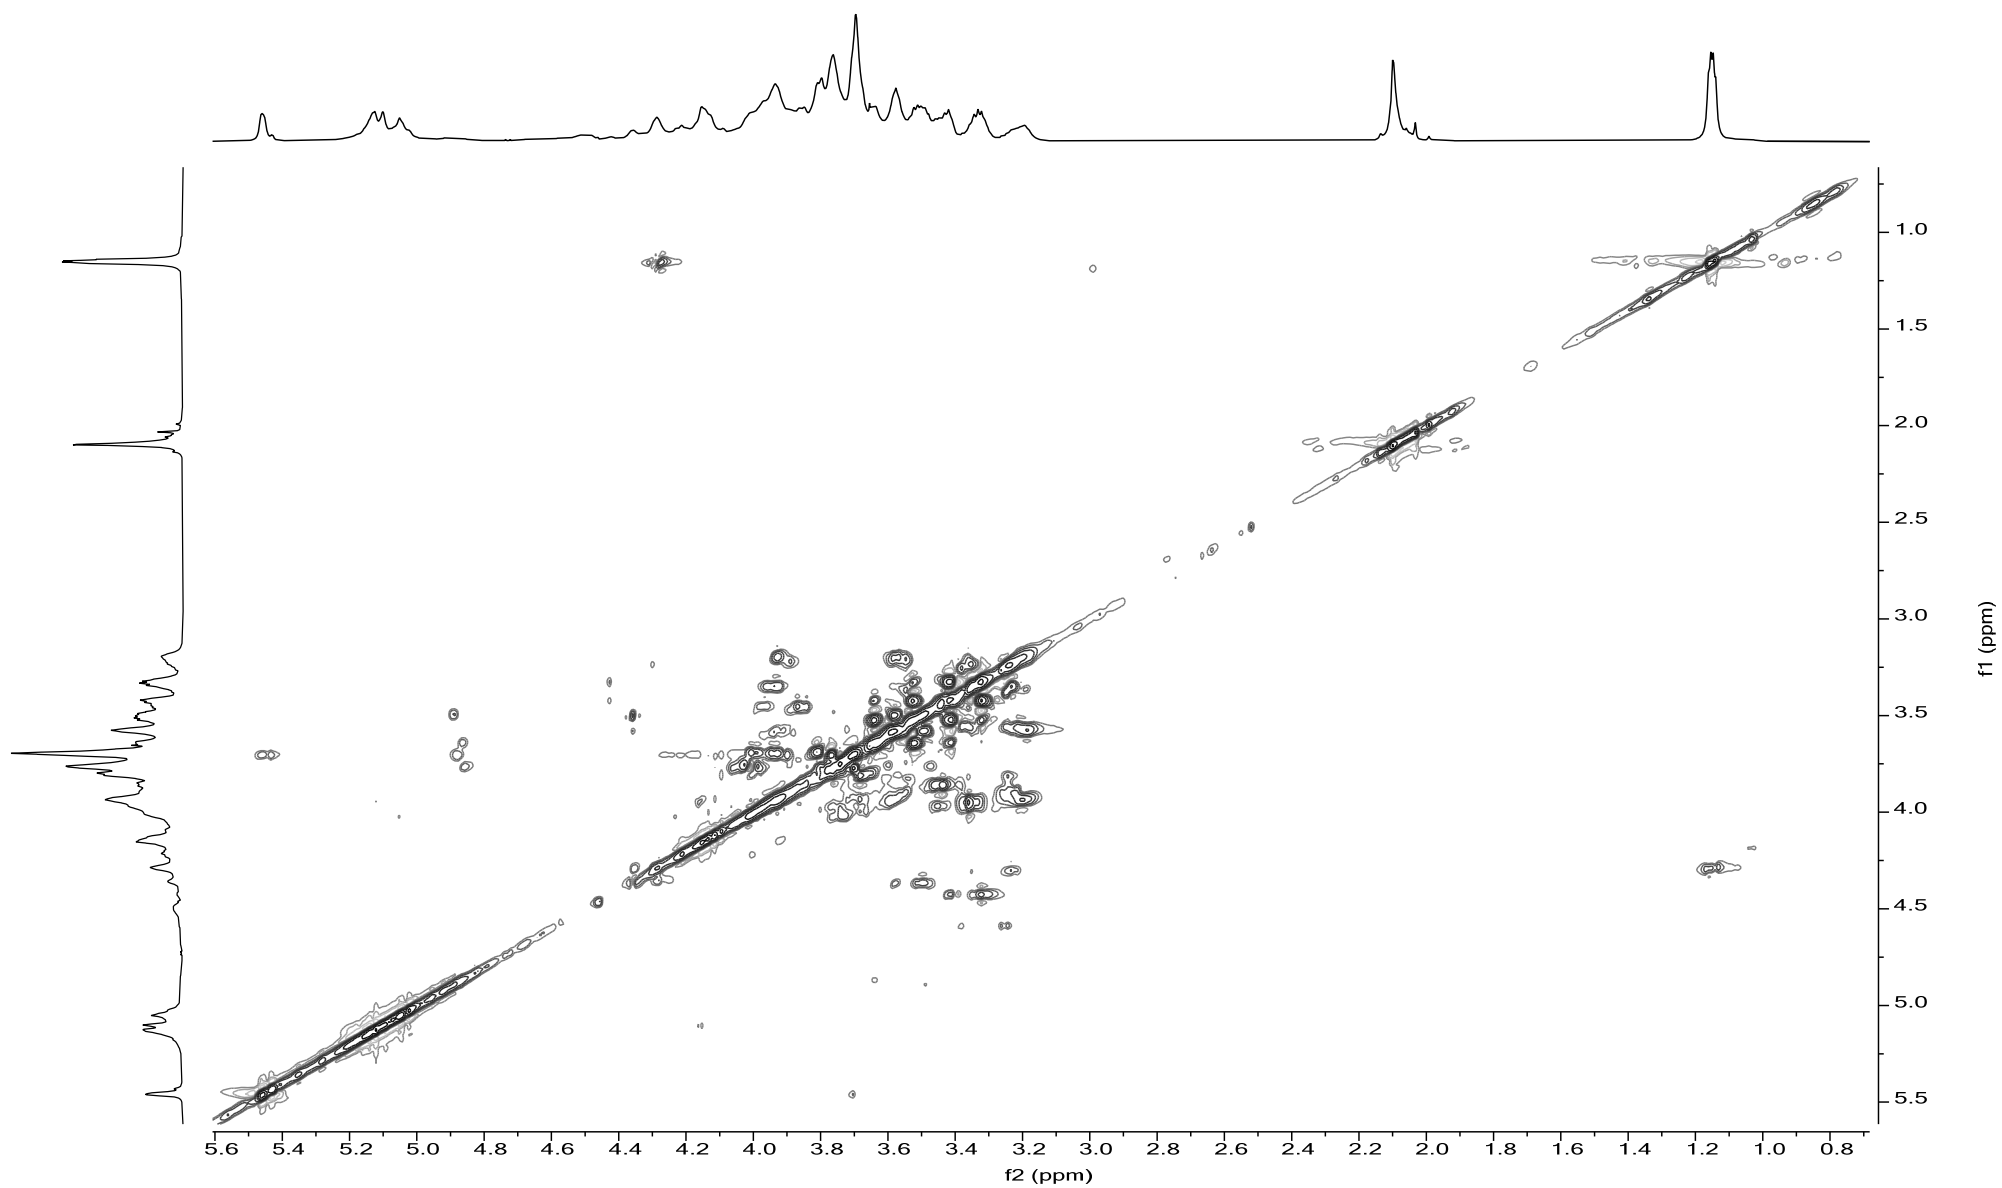

**Figure S9a.** Full TOCSY spectrum of TFP-F1.

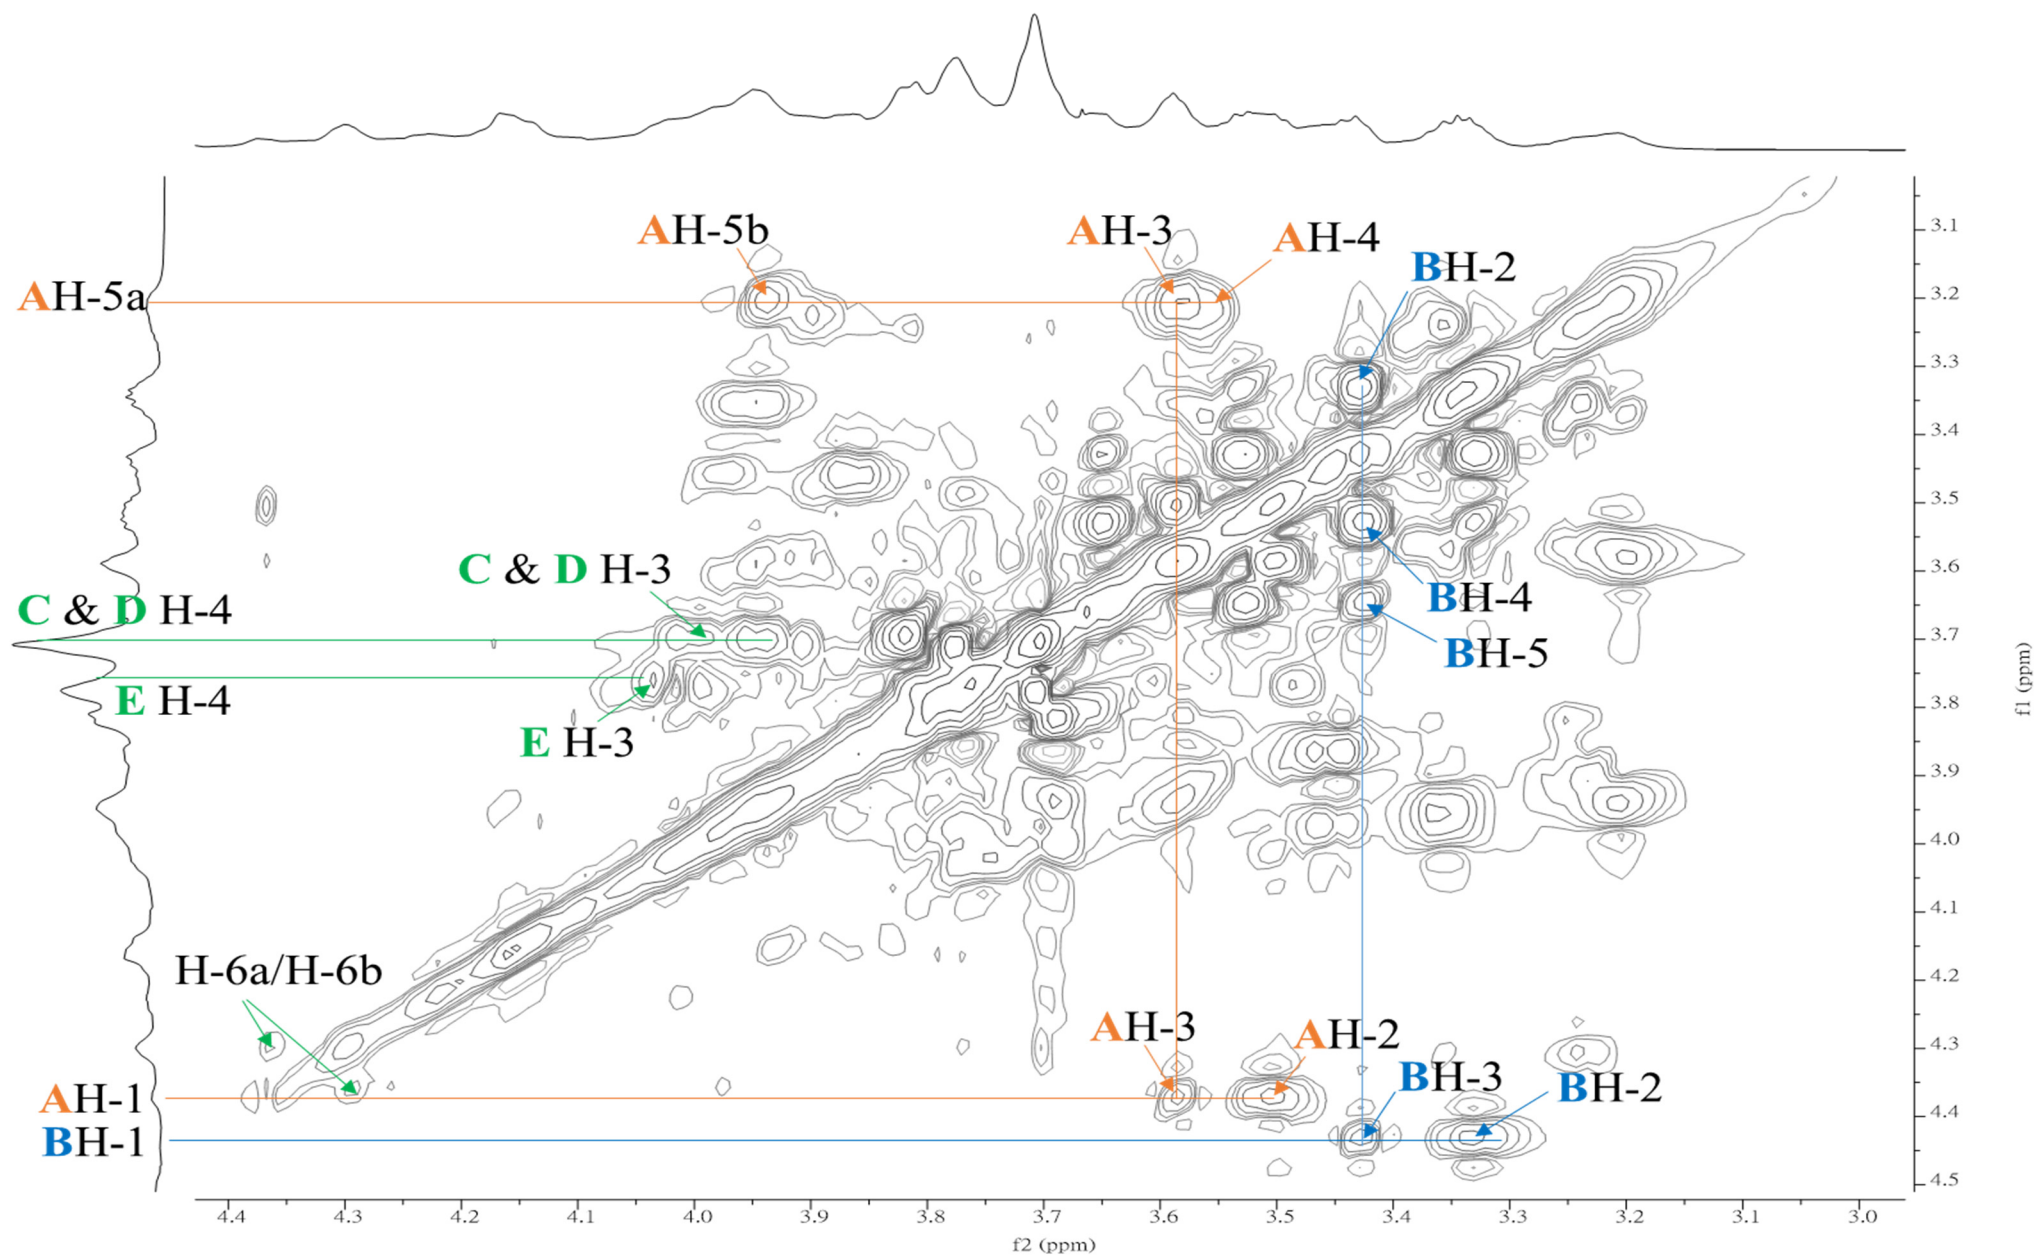

Figure S9b. Enlarged TOCSY spectrum of TFP-F1.

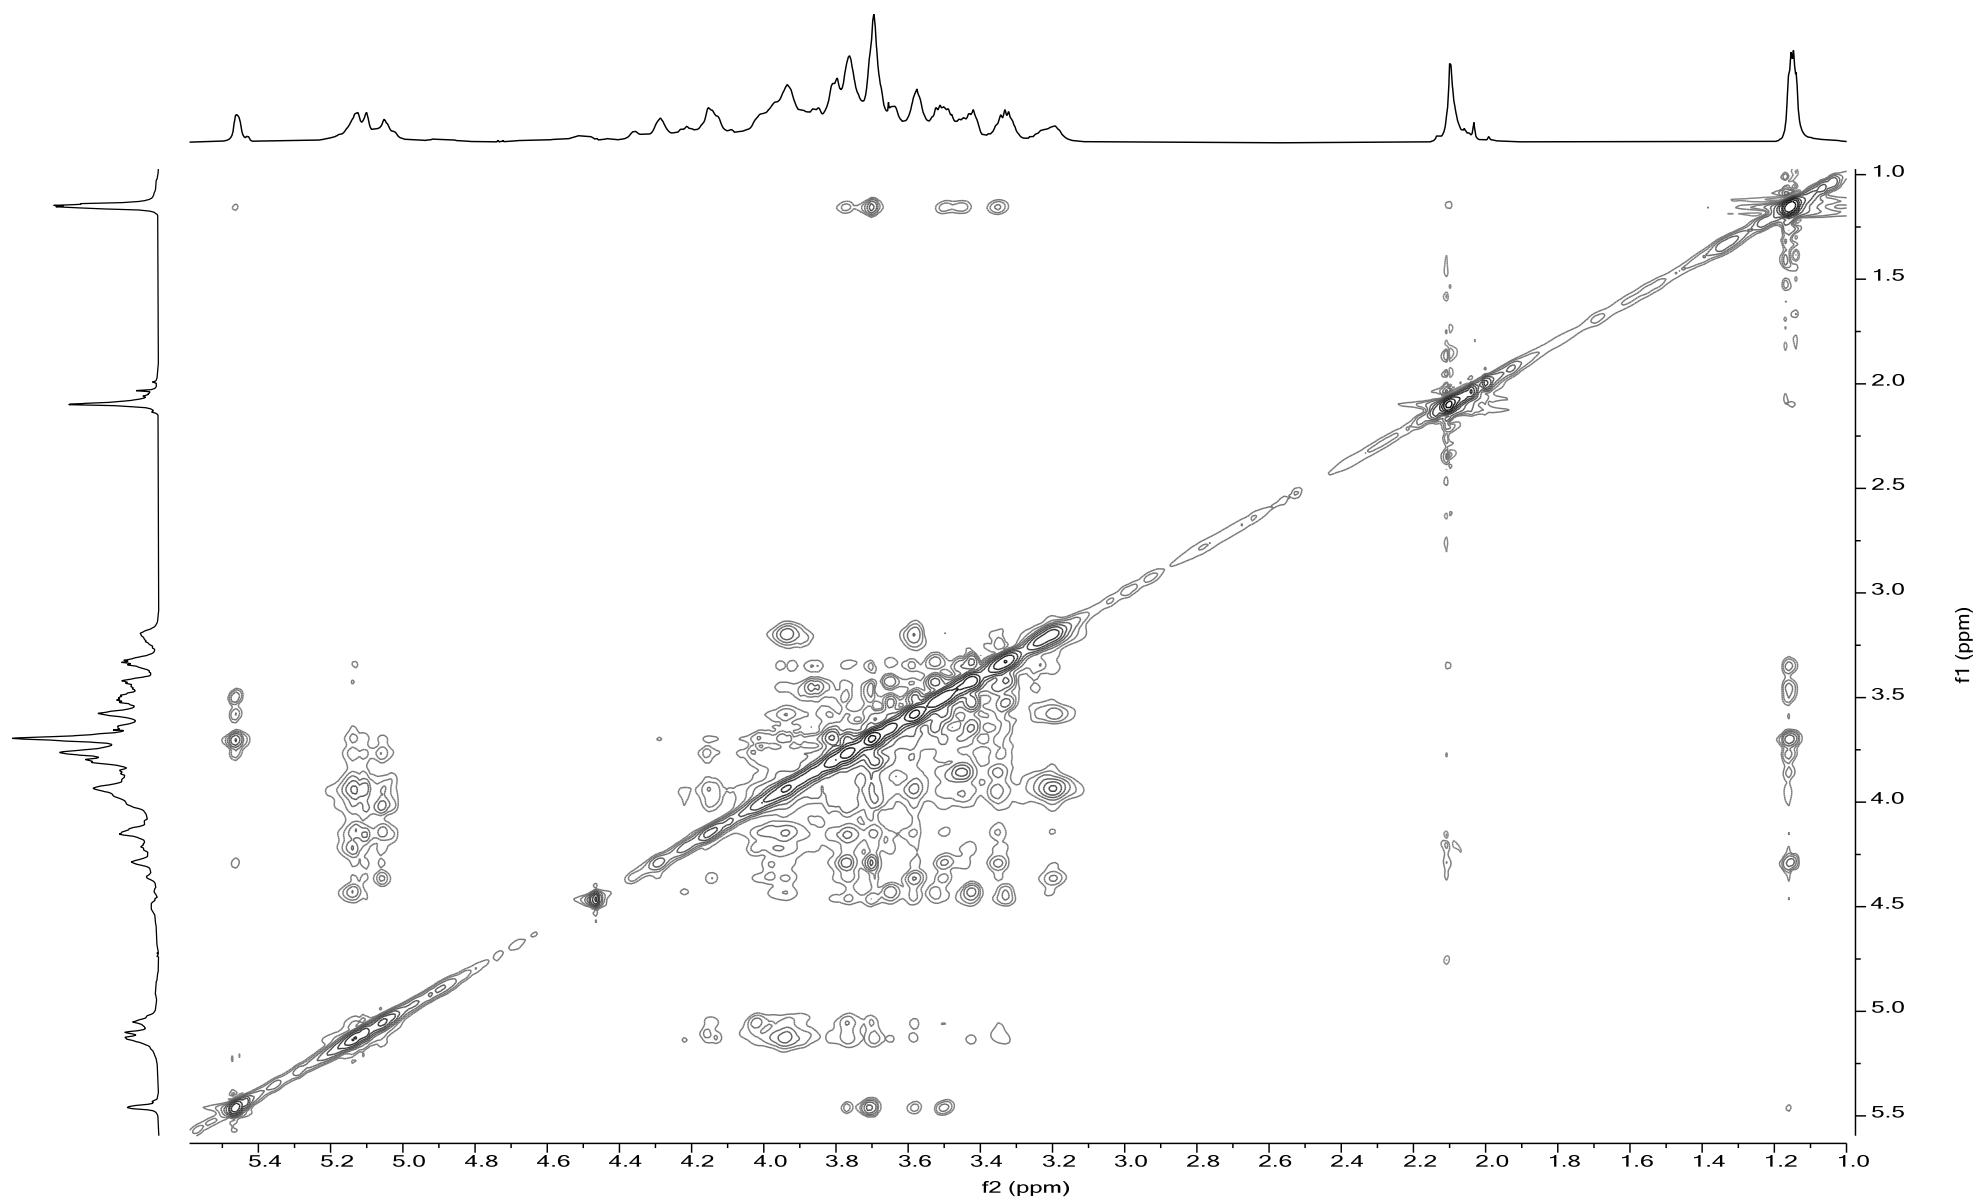

**Figure S10a.** Full NOESY spectrum of TFP-F1.

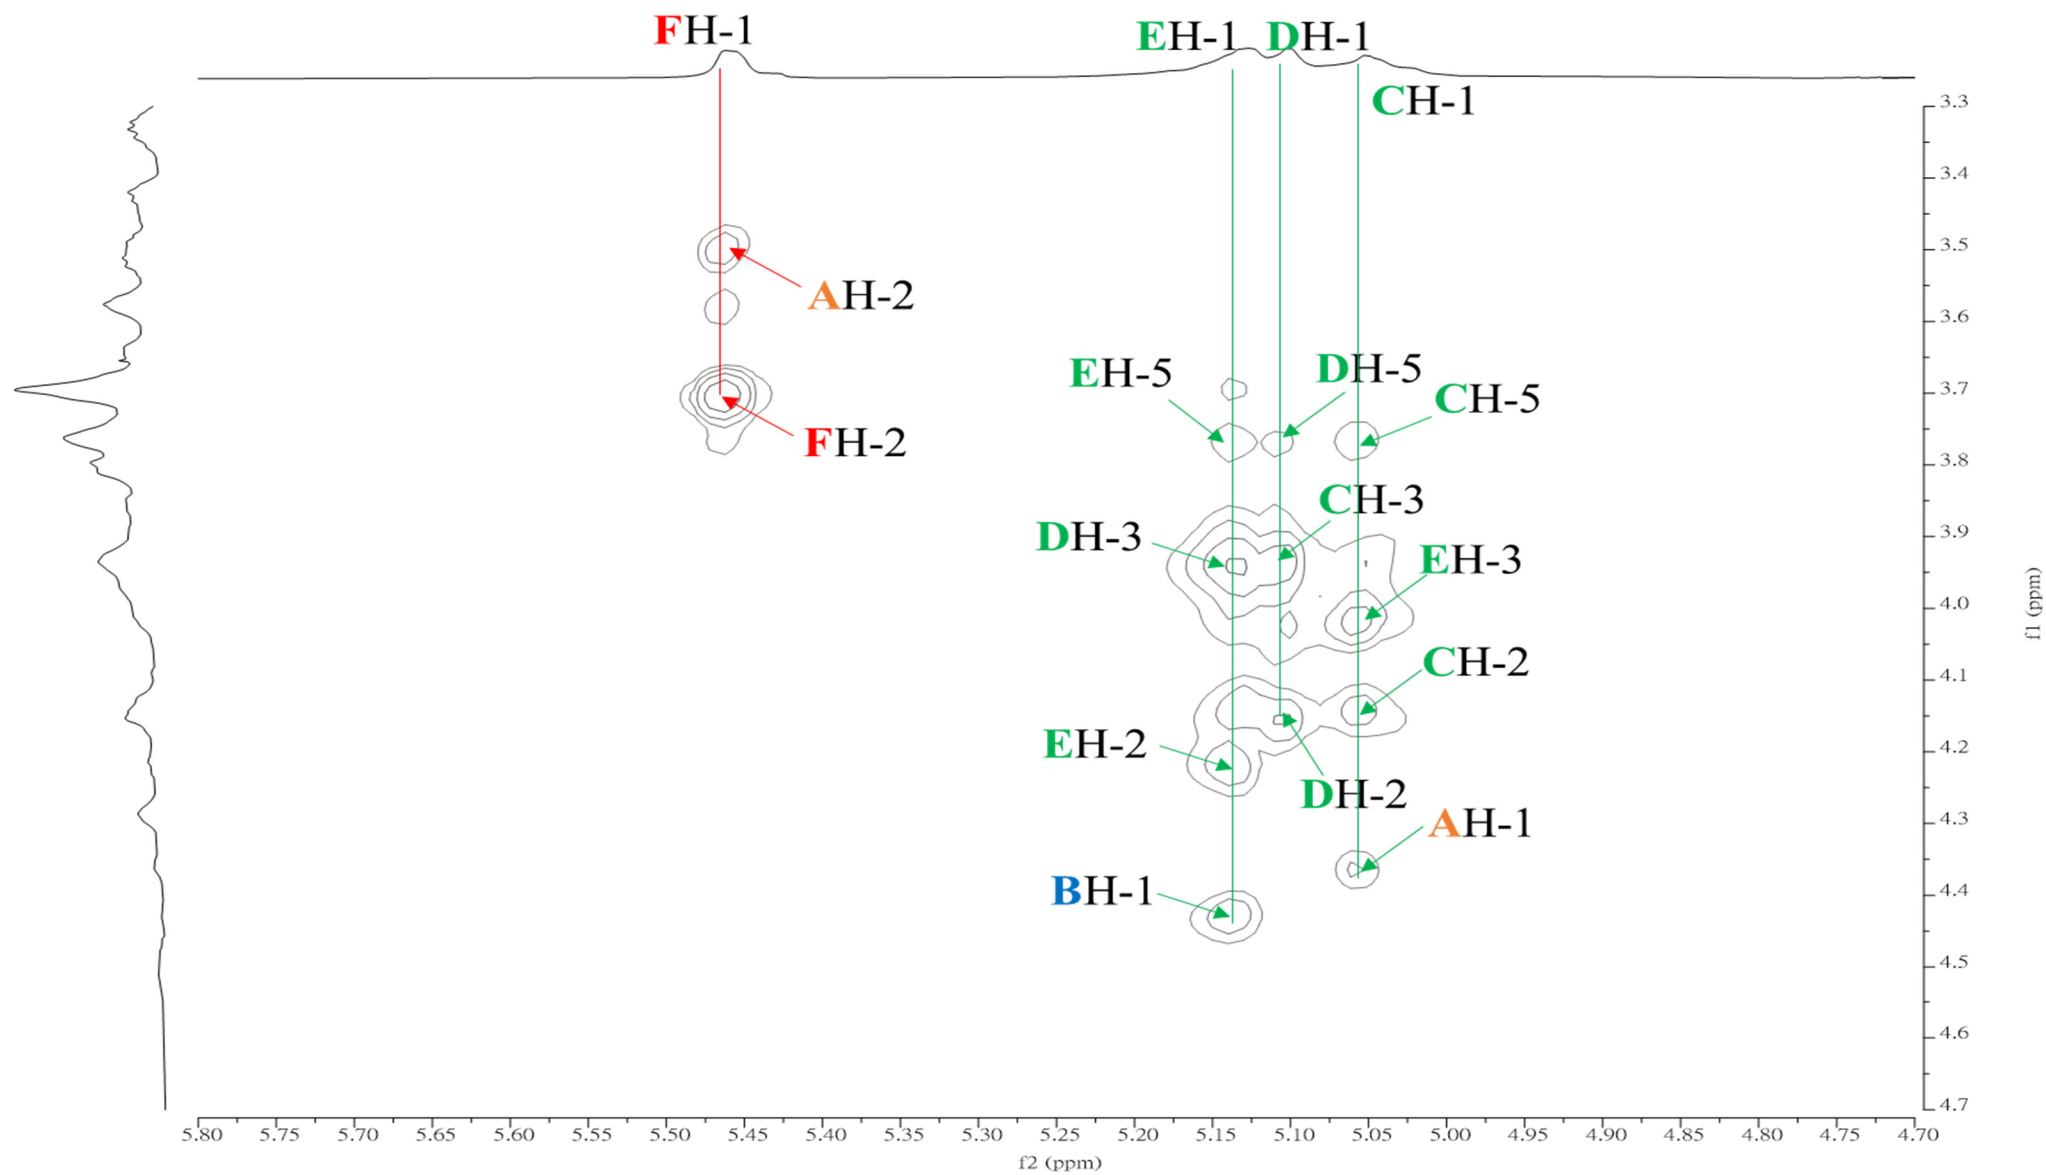

**Figure S10b.** Enlarged NOESY (I) spectrum of TFP-F1.

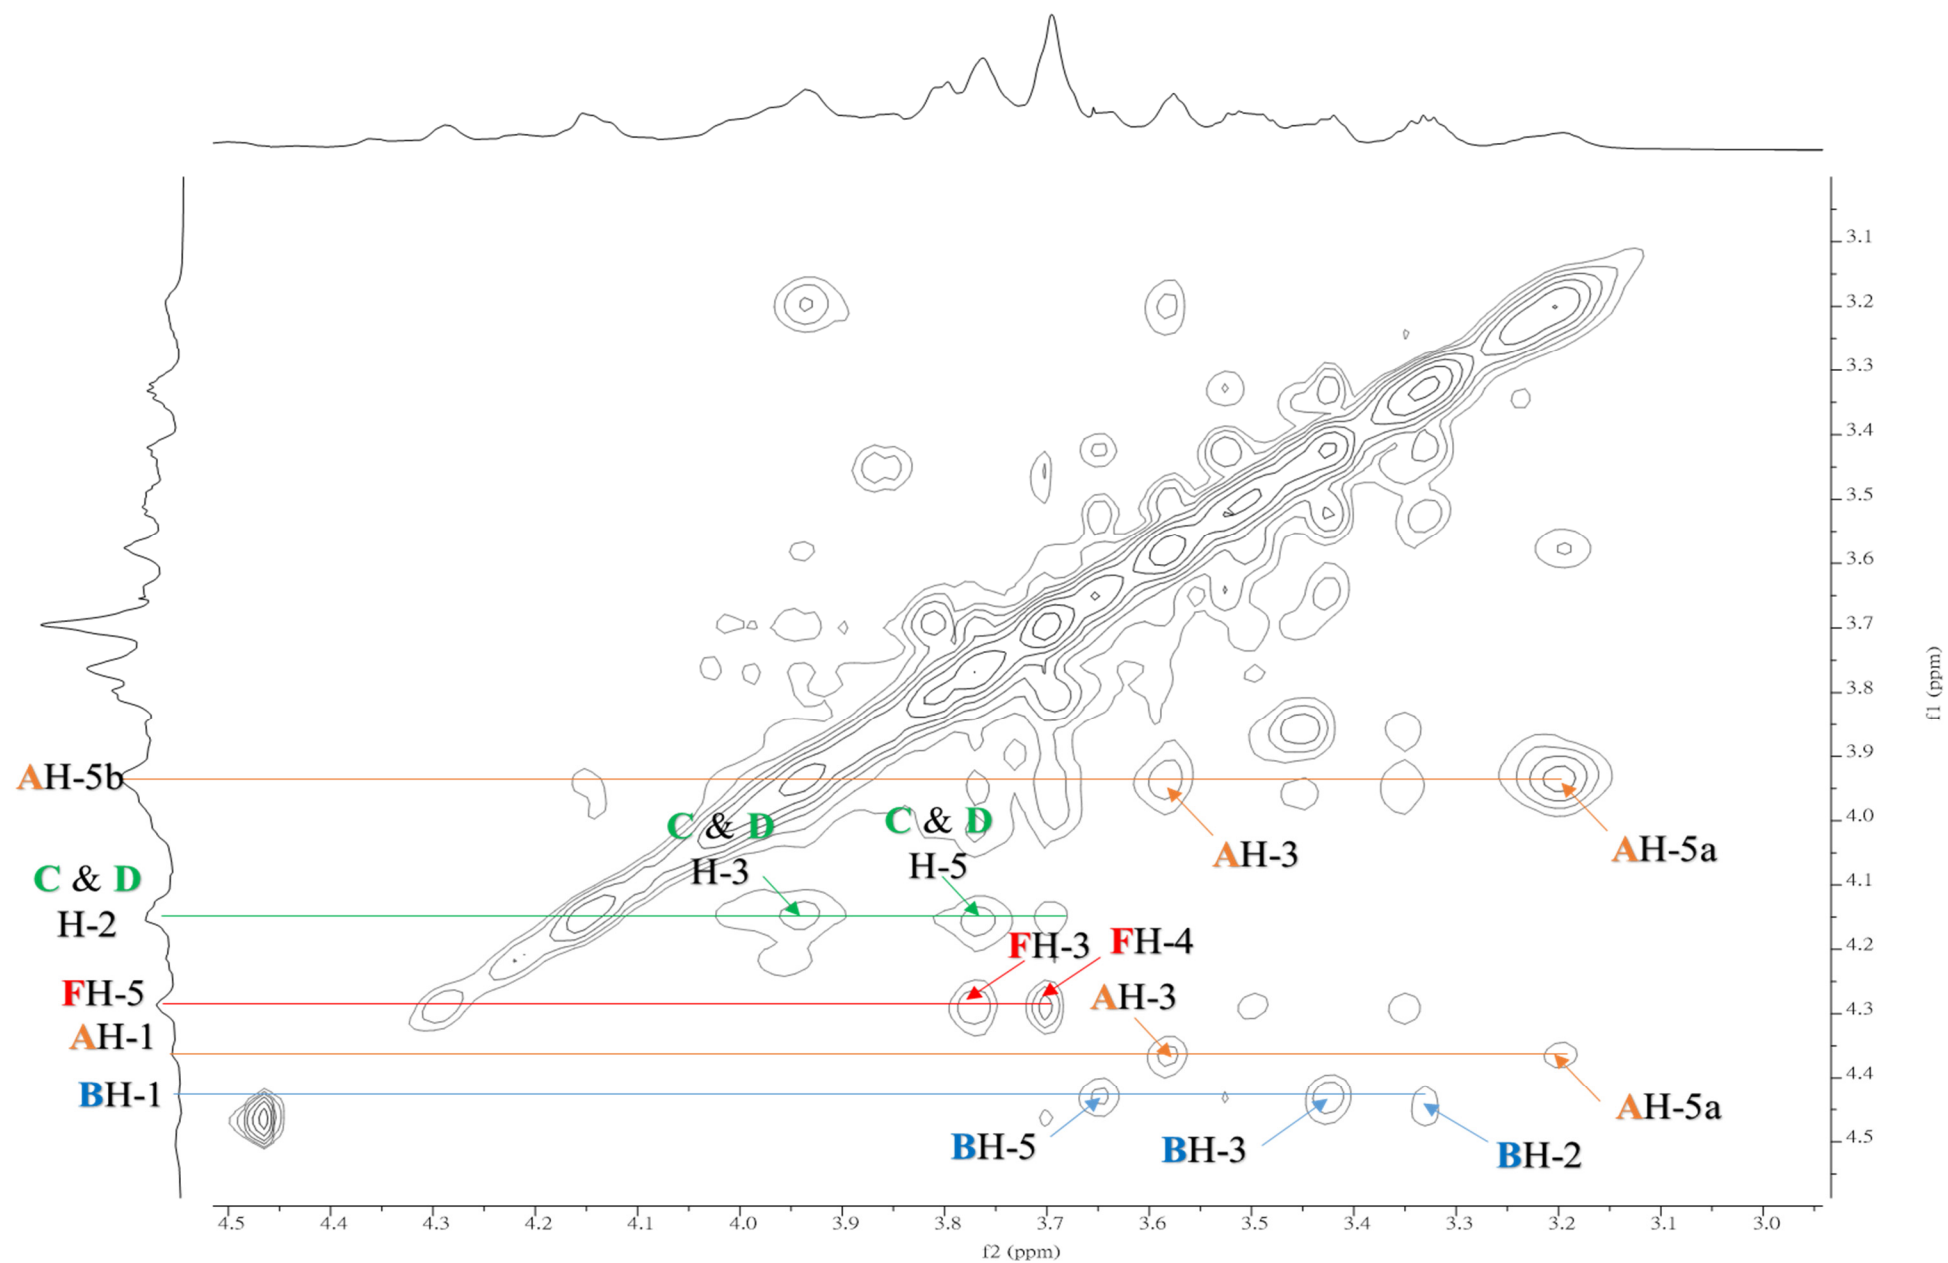

Figure S10c. Enlarged NOESY (II) spectrum of TFP-F1.

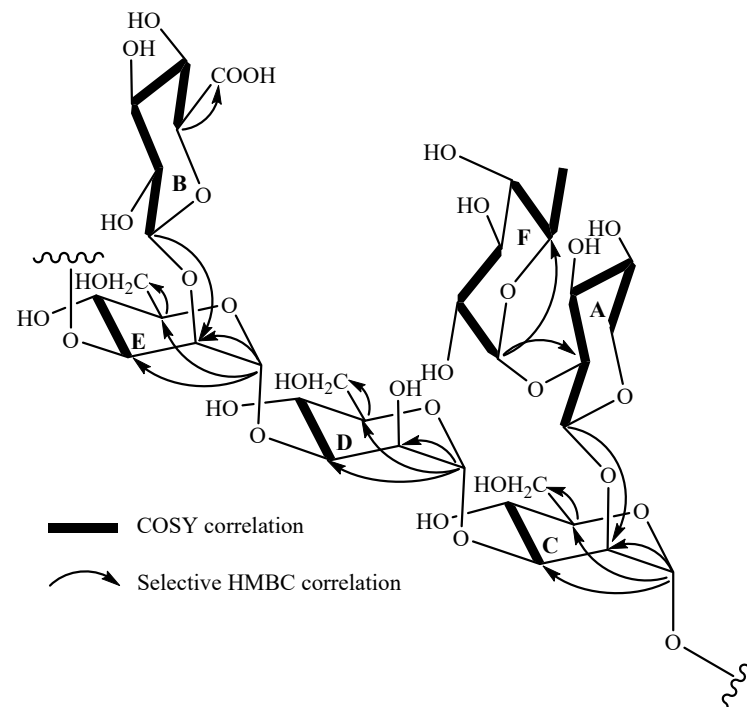

**Figure S11.** COSY and selective HMBC correlations of TFP-F1.

**Table S4.** Key NOE correlations of TFP-F1

| Anomeric signals | NOE correlations ( $\delta$ ppm)                                                                      |
|------------------|-------------------------------------------------------------------------------------------------------|
| <b>A</b> (4.37)  | <b>A</b> H-3 (3.59); <b>A</b> H-5a (3.21); <b>C</b> H-1 (5.06)                                        |
| <b>B</b> (4.44)  | <b>B</b> H-2 (3.33); <b>B</b> H-3 (3.41); <b>B</b> H-5 (3.65); <b>E</b> H-1 (5.13)                    |
| <b>C</b> (5.06)  | <b>C</b> H-2 (4.15); <b>C</b> H-3 (3.94); <b>C</b> H-5 (3.75) <b>A</b> H-1(4.37); <b>E</b> H-3 (4.03) |
| <b>D</b> (5.10)  | <b>D</b> H-2 (4.17); <b>D</b> H-5 (3.78); <b>C</b> H-3 (3.94)                                         |
| <b>E</b> (5.13)  | <b>E</b> H-2 (4.23); <b>E</b> H-5 (3.78); <b>D</b> H-3 (3.94); <b>B</b> H-1 (4.44)                    |
| <b>F</b> (5.47)  | <b>F</b> H-2 (3.72); <b>A</b> H-2 (3.50)                                                              |



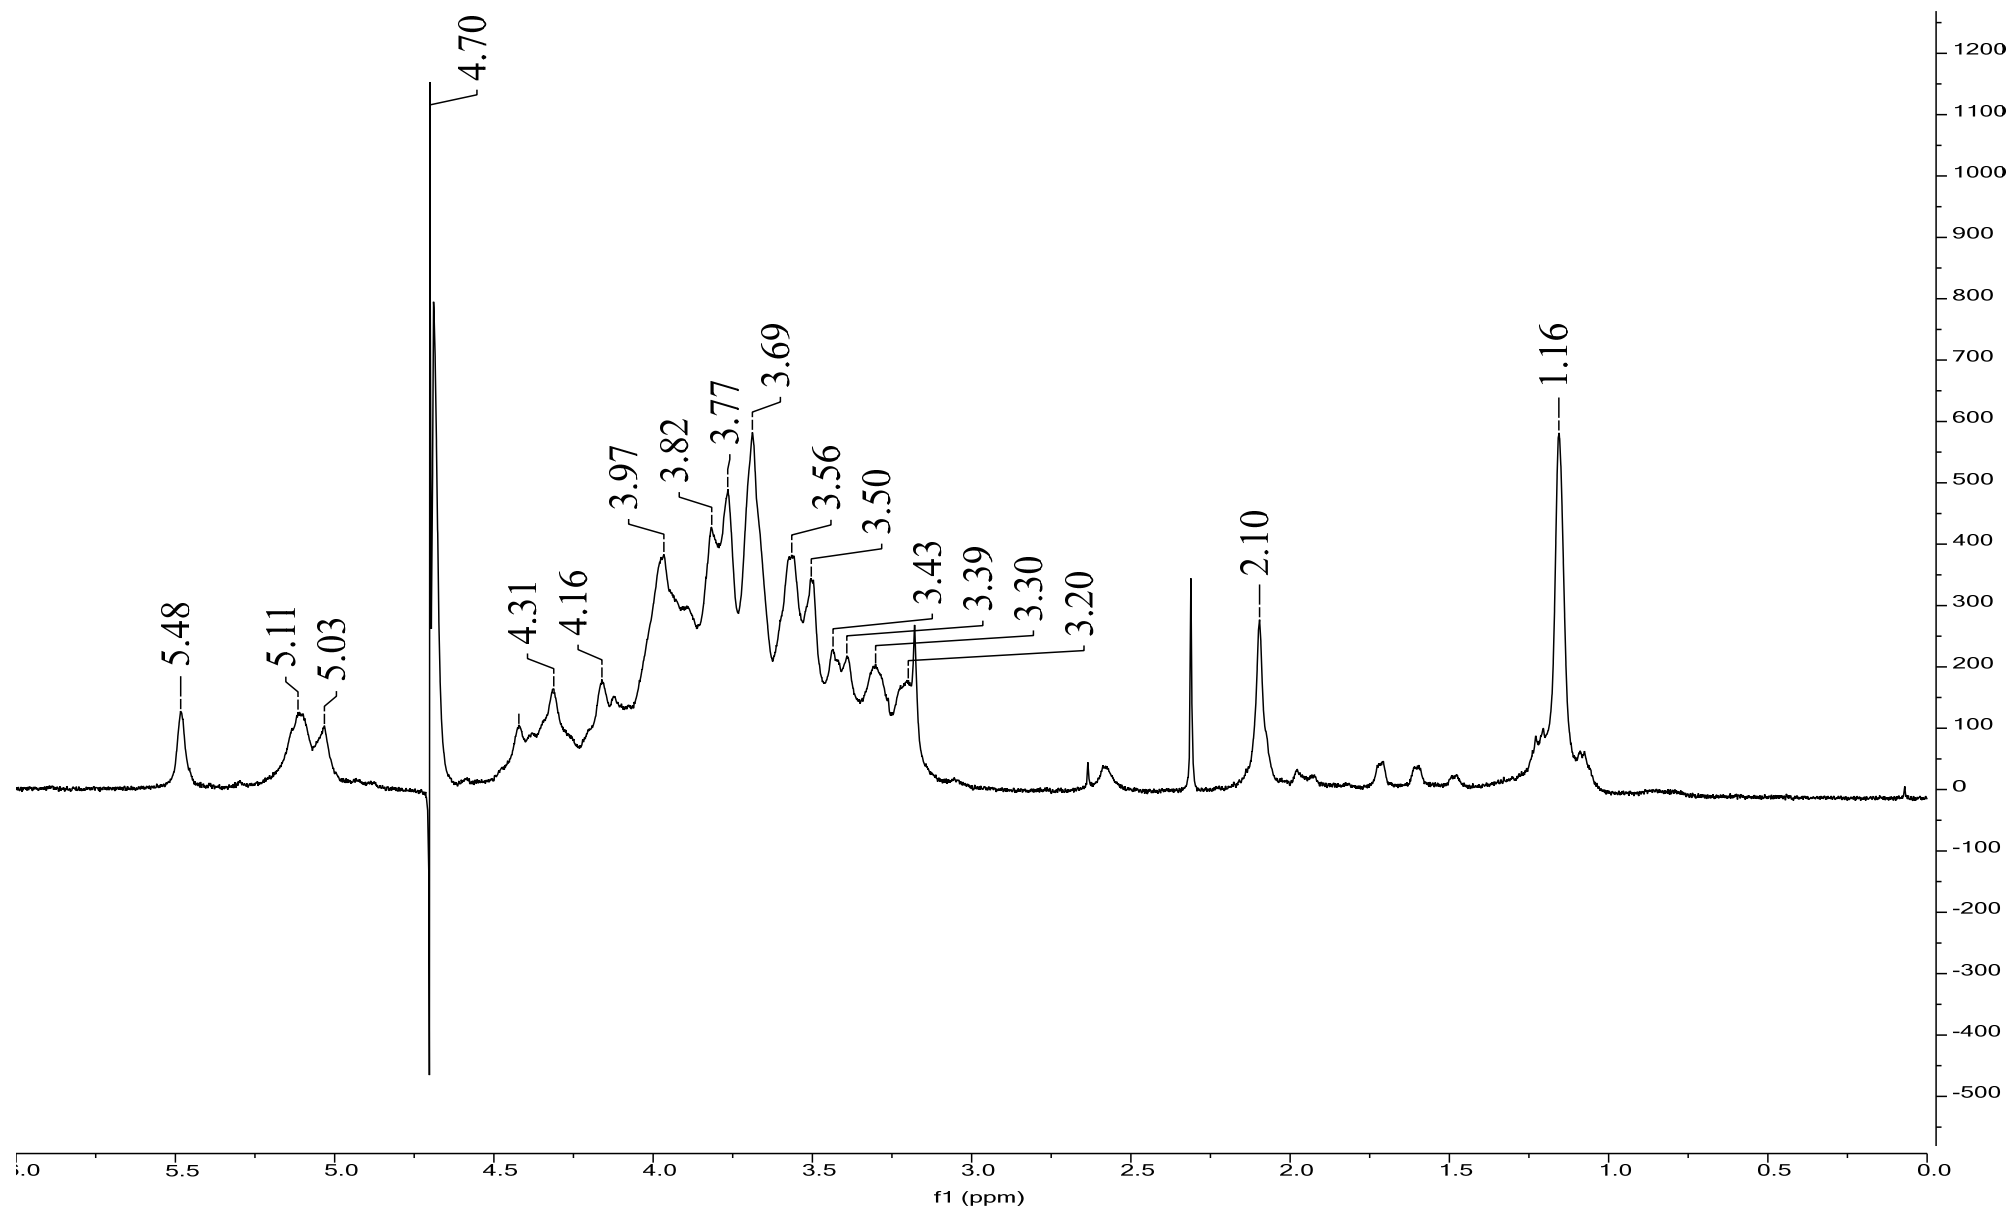

**Figure S12.** Full  $^1\text{H}$  NMR spectrum (800 MHz) of TFP-F1R ( $\text{D}_2\text{O}$ , 298K)

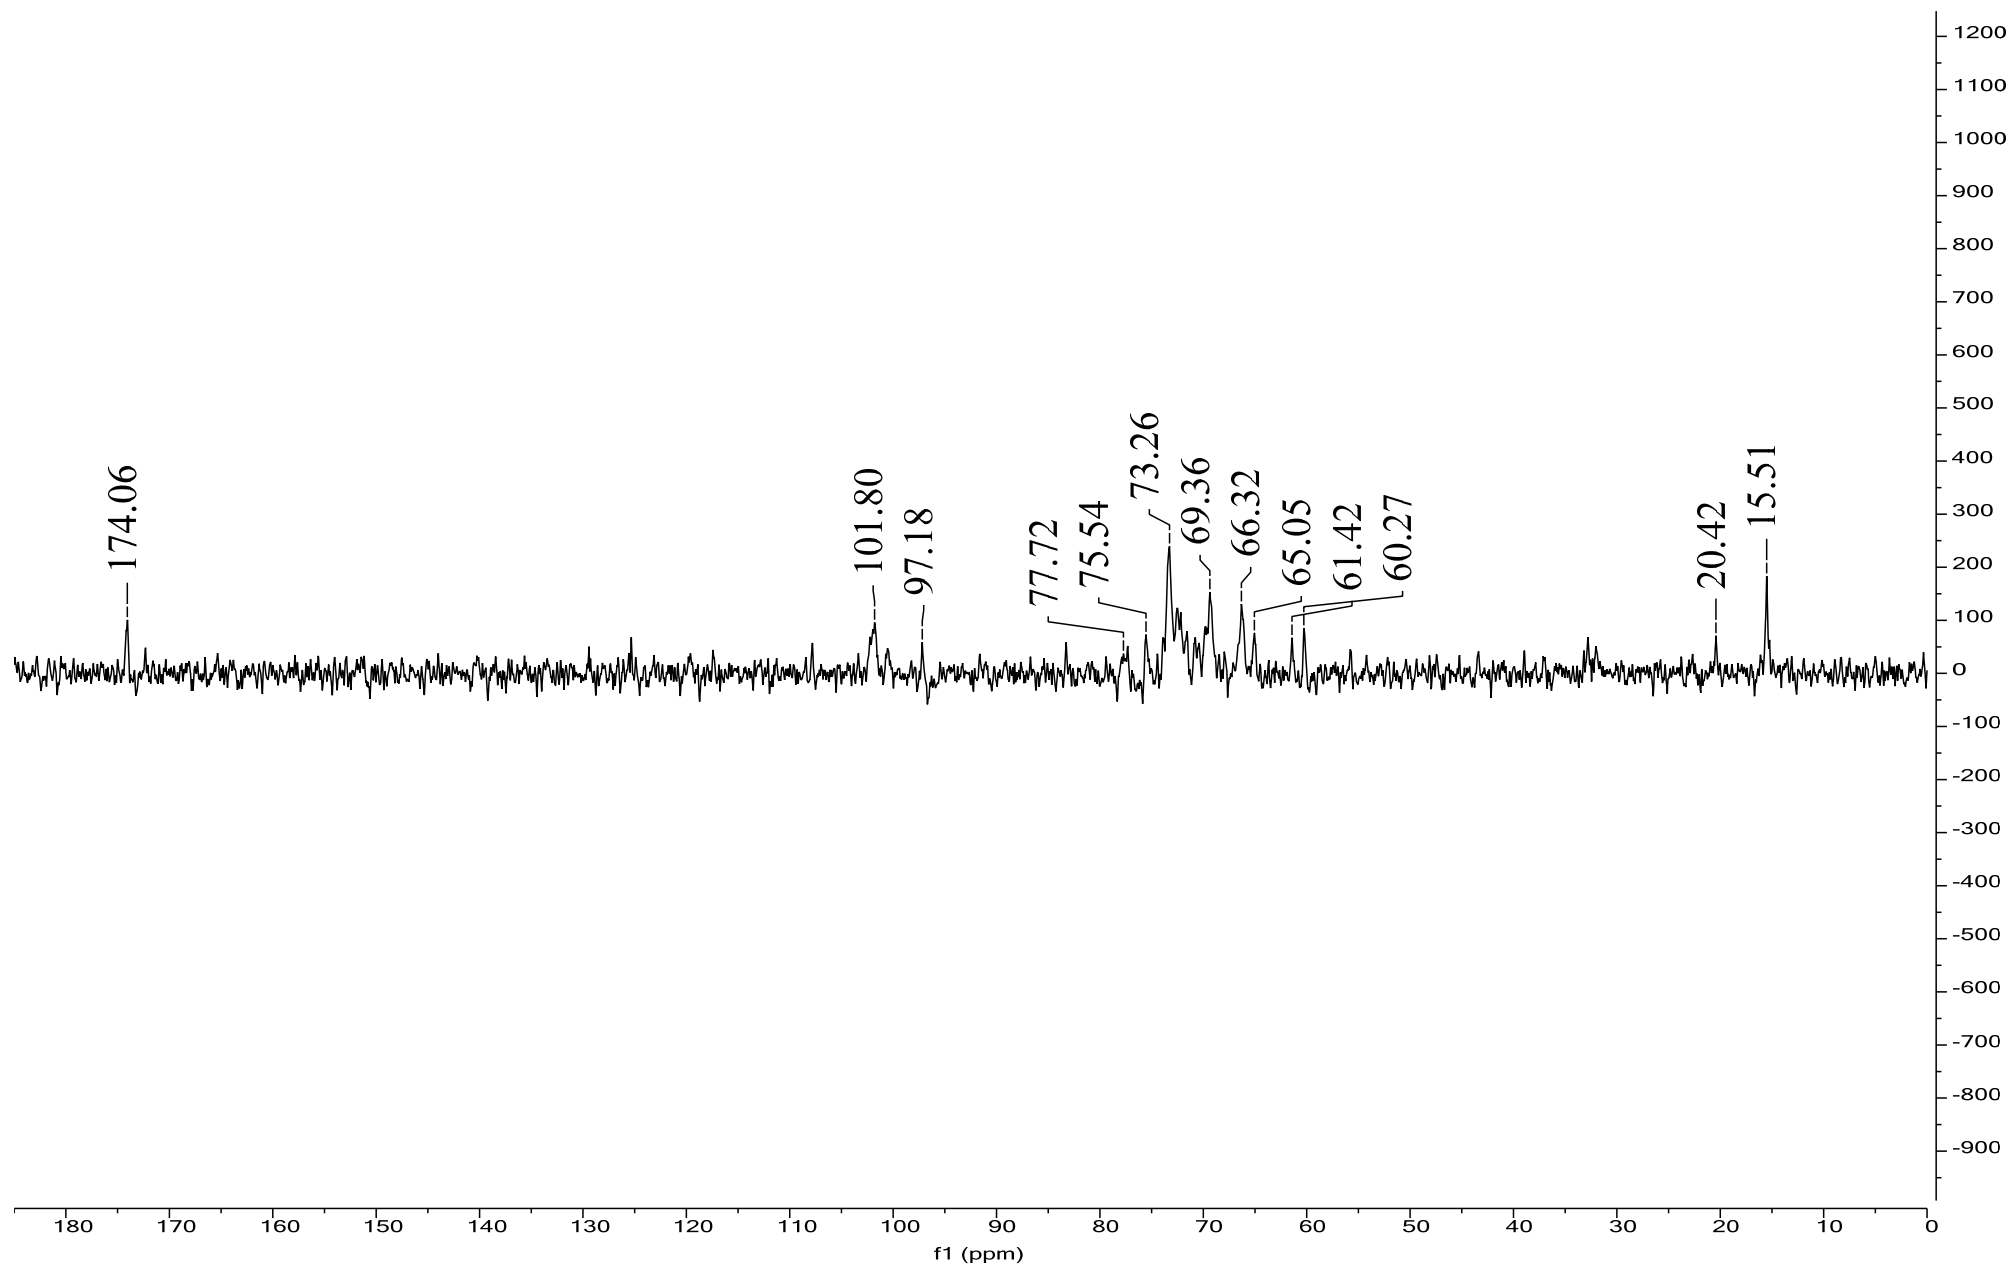

**Figure S13.** Full  $^{13}\text{C}$  NMR spectrum (160 MHz) of TFP-F1R ( $\text{D}_2\text{O}$ , 298K)

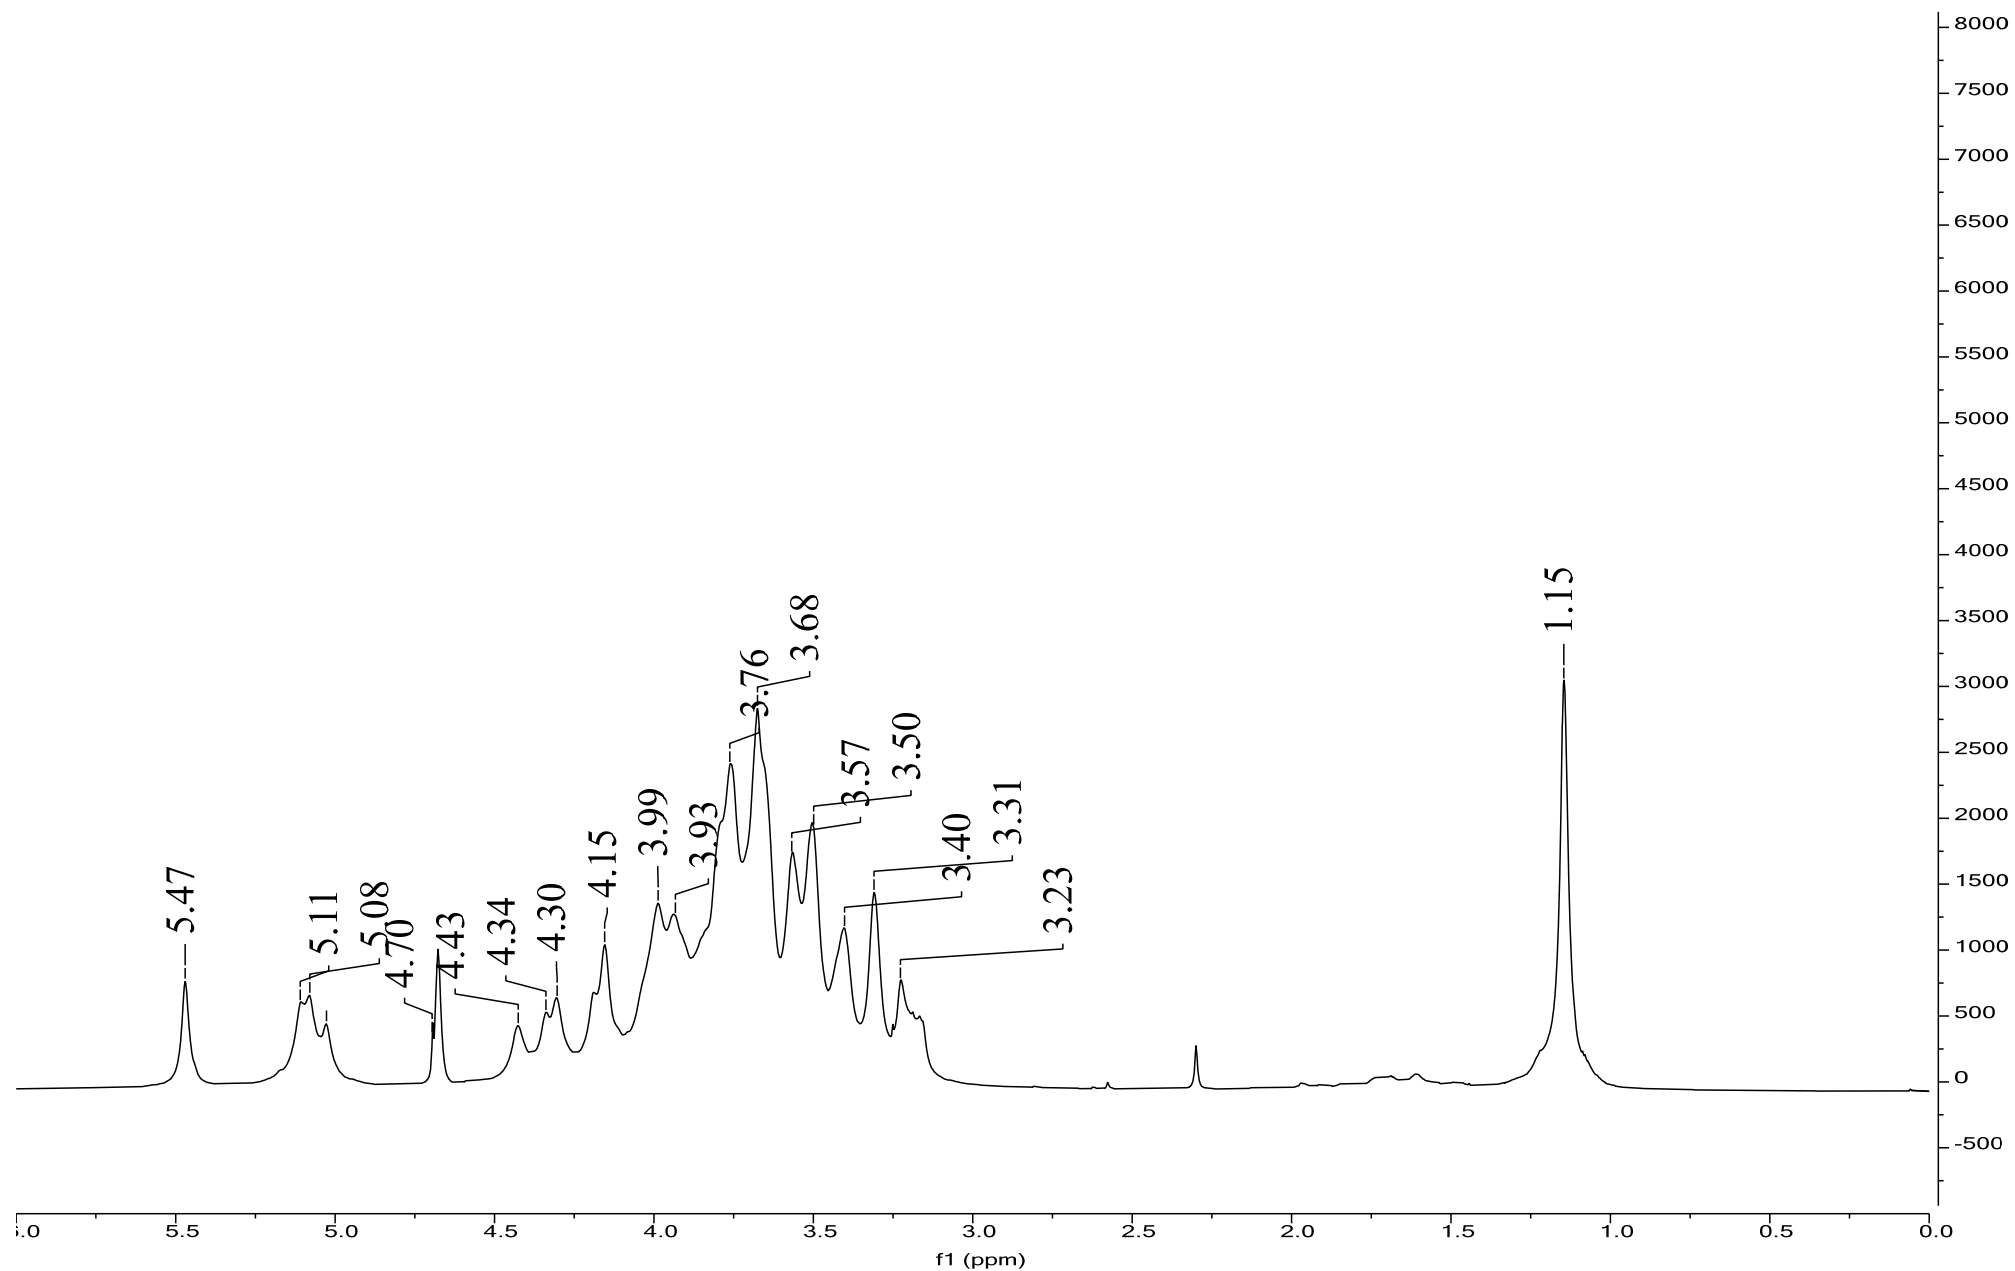

**Figure S14.** Full  $^1\text{H}$  NMR spectrum (800 MHz) of deOAc TFP-F1R ( $\text{D}_2\text{O}$ , 298K)

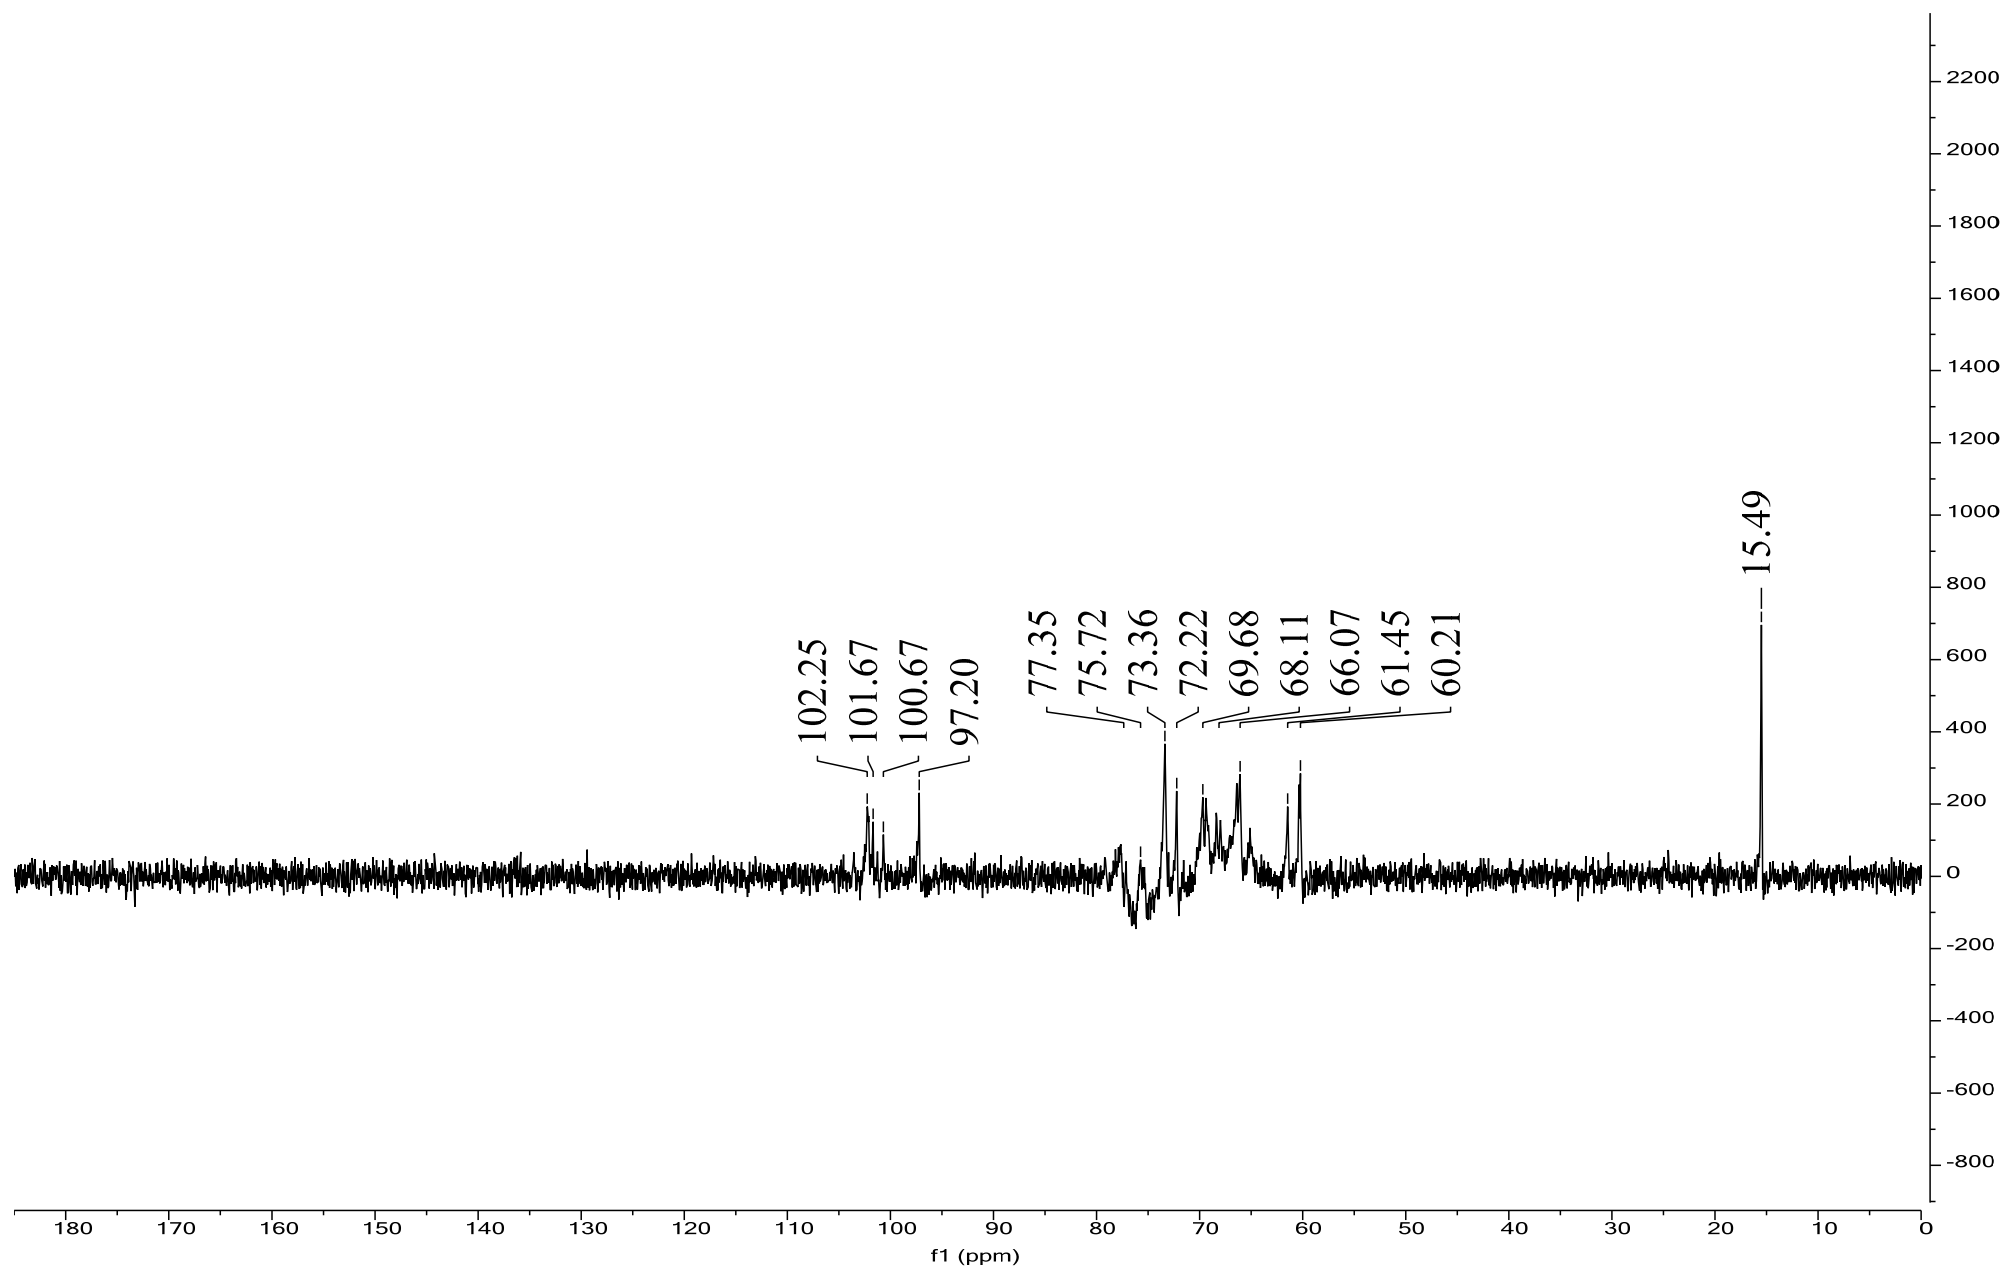

**Figure S15.** Full  $^{13}\text{C}$  NMR spectrum (160 MHz) of deOAc TFP-F1R ( $\text{D}_2\text{O}$ , 298K)

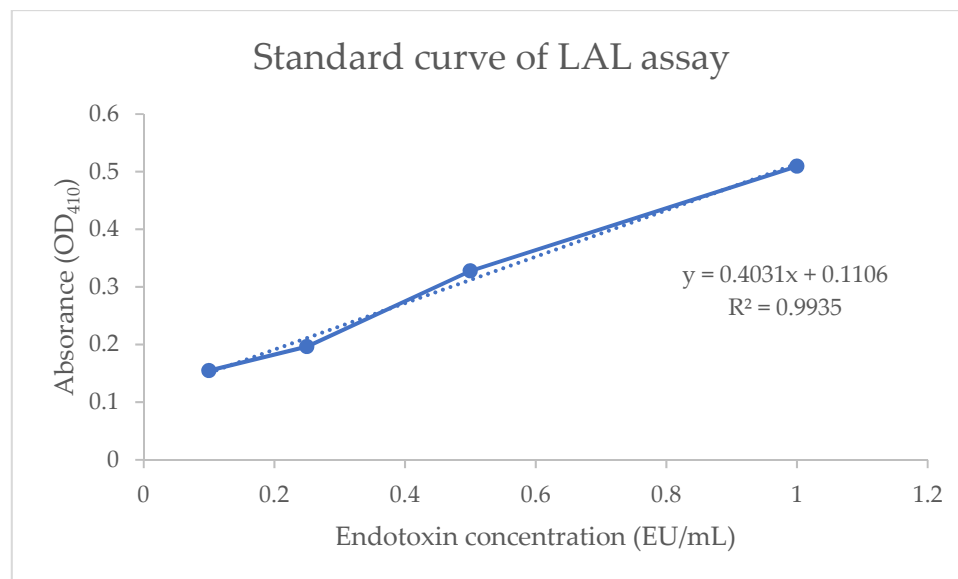

**Figure S16.** The standard curve of LAL assay. The *E. coli* endotoxin was prepared for standards of different concentrations (0.1, 0.25, 0.5, and 1.0 EU/mL).

**Table S5.** The endotoxin quantity of TFP-F1 and its derivatives

| Sample                       | Endotoxin concentration (EU/mL) | Standard deviation |
|------------------------------|---------------------------------|--------------------|
| TFP-F1 (1 $\mu$ g/mL)        | 0.079053998                     | 0.015889224        |
| TFP-F1R (1 $\mu$ g/mL)       | 0.177540712                     | 0.031779415        |
| deOAc TFP-F1R (1 $\mu$ g/mL) | -0.004051926                    | 0.007885321        |

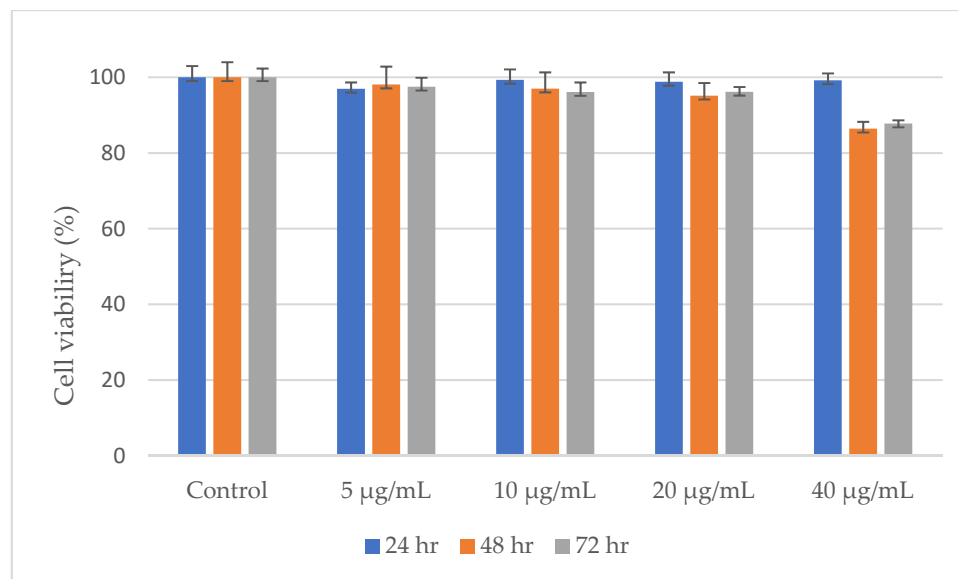

**Figure S17.** Cell viability was measured by Alamar blue assay. J774A.1 cells were treated with different concentrations (5, 10, 20, and 40 µg/mL) of TFP-F1 for 24 h, 48 h, and 72 h.
